# Supplementary material for: Inhibition of mitochondrial metabolism by (−)-jerantinine A: synthesis and biological studies in triple-negative breast cancer cells
Source: Royal Society of Chemistry journal article supplement (doi:10.1039/d3md00049d), 2023-01-01
Supplement: d3md00049d1.pdf [file d3md00049d1.pdf]

## Supplementary Information for

### **Inhibition of Mitochondrial Metabolism by (–)-Jerantinine A: Synthesis and Biological Studies in Triple-Negative Breast Cancer Cells**

Timothy L. Gialelis<sup>a†</sup>, Zifei Wang<sup>b†</sup>, Joshua A. Homer<sup>b†</sup>, Wen-Hsuan Yang<sup>b†</sup>, Taemoon Chung<sup>b†</sup>, Qingting Hu<sup>b,c</sup>, Christopher J. Smedley<sup>a</sup>, Nitin J. Pawar<sup>b</sup>, Nitinkumar S. Upadhyay<sup>b</sup>, David A. Tuveson<sup>b</sup>, Scott K. Lyons<sup>b</sup>, Michael J. Lukey<sup>b\*</sup> and John E. Moses<sup>b\*</sup>

<sup>a</sup> La Trobe Institute for Molecular Science, La Trobe University, Melbourne, VIC 3086, Australia.

<sup>b</sup> Cancer Center, Cold Spring Harbor Laboratory, 1 Bungtown Road, Cold Spring Harbor, NY 11724, USA.

<sup>c</sup> Graduate Program in Genetics, Stony Brook University, Stony Brook, NY 11794, USA.

Email: [moses@cshl.edu](mailto:moses@cshl.edu), [lukey@cshl.edu](mailto:lukey@cshl.edu).

### **Table of Contents**

|                                                                                     |    |
|-------------------------------------------------------------------------------------|----|
| Syntheses of (–)-Jerantinine A, (–)-Melodinine P, and Derivatives .....             | 2  |
| Biological Evaluations of (–)-Jerantinine A, (–)-Melodinine P, and Derivatives..... | 6  |
| NMR spectra of synthesized compounds .....                                          | 14 |
| References.....                                                                     | 24 |

# Syntheses of (–)-Jerantinine A, (–)-Melodinine P, and Derivatives

## Materials and methods

All commercially obtained reagents were used as received unless otherwise noted. A generous gift of 1Kg of (–)-tabersonine was donated by Dr Dong, Shanghai Institute of Organic Chemistry, China. Thin-layer chromatography (TLC) was performed using E. Merck silica gel 60 F254 pre-coated plates (0.25 mm). Visualization of the chromatogram was accomplished by UV, staining as necessary. All samples were purified using Biotage Selekt flash column chromatography.  $^{19}\text{F}$  (Bruker-377 MHz),  $^1\text{H}$  (Bruker-400 MHz), and  $^{13}\text{C}$  NMR (Bruker-101 MHz) spectra were recorded using  $\text{CDCl}_3$  as solvents. Data for  $^1\text{H}$  are reported as follows: chemical shift ( $\delta$  ppm), multiplicity (s = singlet, br s = broad singlet, d = doublet, t = triplet, q = quartet, m = multiplet), coupling constant in Hz, and integration. When necessary, proton and carbon assignments were made by means of  $^1\text{H}$ - $^1\text{H}$  COSY,  $^1\text{H}$ - $^{13}\text{C}$  and HSQC. Mass spectra were obtained using a Q Exactive HF (Ionization source: HESI II) mass spectrometer at the Cold Spring Harbor Laboratory. IR were obtained using Perkin Elmer FT-IR spectrometer at the Cold Spring Harbor Laboratory.

### (–)-15-Iodo-tabersonine (**4**)<sup>1</sup>

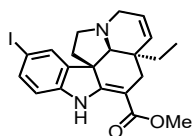

To a stirred solution of tabersonine (**TAB, 3**) (2.93 g, 8.71 mmol) in TFA (90 mL) was added NIS (1.96 g, 8.71 mmol) in 4 portions over 30 min. The reaction was allowed to stir for 16 h. TFA was then evaporated and the residue was diluted with NaOH (1M aq, 100 mL) at 0 °C and extracted with  $\text{CH}_2\text{Cl}_2$  (3  $\times$  100 mL). The combined organic fractions were then dried over anhydrous  $\text{MgSO}_4$ , filtered and the solvent removed under reduced pressure. The crude material was dissolved in pentane (250 mL), filtered and concentrated *in vacuo* to give (–)-15-iodo-tabersonine (**4**) as a white solid (3.79 g, 94%). **m.p.**: 85 °C;  $[\alpha]_D^{25}$  –119 (c 0.10,  $\text{CHCl}_3$ ); **R<sub>f</sub>** = 0.4 in 4:1 hexanes-ethyl acetate; **IR** (neat,  $\nu$ ,  $\text{cm}^{-1}$ ): 3359, 3022, 2959, 1671, 1131;  **$^1\text{H}$  NMR** (400 MHz,  $\text{CDCl}_3$ )  $\delta$  8.92 (s, 1H), 7.43 (d,  $J$  = 1.8 Hz, 1H), 7.39 – 7.31 (m, 1H), 6.53 (d,  $J$  = 8.1 Hz, 1H), 5.71 (ddd,  $J$  = 10.0, 4.7, 1.5 Hz, 1H), 5.63 (dt,  $J$  = 9.9, 1.9 Hz, 1H), 3.69 (s, 3H), 3.38 (ddd,  $J$  = 16.0, 4.7, 1.5 Hz, 1H), 3.13 (dt,  $J$  = 16.0, 2.0 Hz, 1H), 3.02 – 2.93 (m, 1H), 2.62 (ddd,  $J$  = 10.7, 8.5, 4.8 Hz, 1H), 2.55 (s, 1H), 2.48 (dd,  $J$  = 15.2, 1.9 Hz, 1H), 2.33 (d,  $J$  = 15.1 Hz, 1H), 1.98 (td,  $J$  = 11.3, 6.5 Hz, 1H), 1.79 – 1.70 (m, 1H), 0.96 – 0.86 (m, 1H), 0.82 – 0.78 (m, 1H), 0.57 (t,  $J$  = 7.4 Hz, 3H);  **$^{13}\text{C}$  NMR** (101 MHz,  $\text{CDCl}_3$ )  $\delta$  168.9, 165.5, 143.0, 140.7, 136.4, 132.8, 130.4, 124.9, 111.4, 92.9, 82.5, 70.1, 55.1, 51.1, 51.0, 50.4, 44.5, 41.2, 28.5, 27.1, 7.5; **HRMS (ESI<sup>+</sup>)**: calculated for  $\text{C}_{21}\text{H}_{24}\text{IN}_2\text{O}_2$   $[\text{M}+\text{H}]^+$ :  $m/z$  = 463.0882,  $m/z$  found 463.0878.

### (–)-15-BPin-tabersonine (**5**)<sup>2</sup>

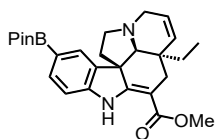

To a solution of (–)-15-iodo-tabersonine (**4**) (1.00 g, 2.16 mmol),  $\text{B}_2\text{Pin}_2$  (1.40 g, 5.51 mmol) and KOAc (2.15 g, 21.60 mmol) in degassed DMF (20 mL) was added  $\text{PdCl}_2(\text{dppf})\text{CH}_2\text{Cl}_2$  (0.32 g, 0.39 mmol) under a positive flow of  $\text{N}_2$ . The resulting mixture was heated at 80 °C for 16 h (before returning to room temperature). The reaction mixture was then diluted with water (200 mL) and extracted with EtOAc (4  $\times$  100 mL). The combined organic fractions were washed with  $\text{H}_2\text{O}$  (3  $\times$  100 mL), brine (50 mL), dried over anhydrous  $\text{Na}_2\text{SO}_4$ , filtered and concentrated *in vacuo*. Purification by flash column chromatography (0–20% EtOAc in hexanes) to afford (–)-15-BPin-tabersonine (**5**) as a white solid (0.82 g, 82%). **m.p.**: 100–102 °C;  $[\alpha]_D^{25}$  –240 (c 0.010,  $\text{CHCl}_3$ ); **R<sub>f</sub>** = 0.4 in 2:1 hexanes-ethyl acetate; **IR** (neat,  $\nu$ ,  $\text{cm}^{-1}$ ): 2918, 1673;  **$^1\text{H}$  NMR** (400 MHz,  $\text{CDCl}_3$ )  $\delta$  9.01 (s, 1H), 7.62 – 7.52 (m, 2H), 6.74 (d,  $J$  = 7.8 Hz, 1H), 5.71 (ddd,  $J$  = 9.9, 4.6, 1.5 Hz, 1H), 5.64 (dt,  $J$  = 9.9, 1.9 Hz, 1H), 3.70 (s, 3H), 3.39 (ddd,  $J$  = 15.8, 4.6, 1.5 Hz, 1H), 3.19 (dt,  $J$  = 15.9, 2.0 Hz, 1H), 2.95 (dd,  $J$  = 8.4, 6.2 Hz, 1H), 2.78 – 2.69 (m, 1H), 2.68 (s, 1H), 2.48 (dd,  $J$  = 15.1, 1.8 Hz, 1H), 2.37 (d,  $J$  = 15.1 Hz, 1H), 2.03 – 1.91 (m, 1H), 1.71 (dd,  $J$  = 11.5, 4.4 Hz, 1H), 1.27 (s, 12H), 0.95 – 0.86 (m, 1H), 0.77 (ddd,  $J$  = 9.8, 4.2, 2.6 Hz, 1H), 0.56 (t,  $J$  = 7.4 Hz, 3H);  **$^{13}\text{C}$  NMR** (101 MHz,  $\text{CDCl}_3$ )  $\delta$  169.0, 166.5, 146.0, 137.4, 135.6, 133.0, 127.3, 125.0, 108.8, 92.9, 83.6, 69.7, 54.9, 51.1, 50.9, 50.6, 44.7, 41.5, 28.2, 26.8, 24.9, 24.9, 7.5; **HRMS (ESI<sup>+</sup>)**: calculated for  $\text{C}_{27}\text{H}_{36}\text{BN}_2\text{O}_4$   $[\text{M}+\text{H}]^+$ :  $m/z$  = 463.2768,  $m/z$  found 463.2760.

### (–)-Melodinine P (**6**)<sup>2</sup>

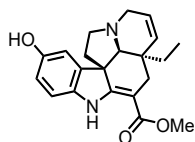

To a solution of (–)-15-BPin-tabersonine (**5**) (0.50 g, 1.08 mmol) and H<sub>2</sub>O<sub>2</sub> (35% *aq*, 1.25 mL) in THF (10 mL) was added NaOH (1M *aq*, 3.00 mL) dropwise at 0 °C. The reaction was allowed to stir at 0 °C for a further 1 h. The reaction mixture was then neutralized to pH 7 using HCl (1M *aq*), washed with Na<sub>2</sub>S<sub>2</sub>O<sub>3</sub> (sat. *aq*) and extracted with EtOAc (3 × 50 mL). The combined organic layers were dried over anhydrous Na<sub>2</sub>SO<sub>4</sub>, filtered, and concentrated *in vacuo*. Purification by flash column chromatography (0-50% EtOAc in hexanes) to afford (–)-melodinine P (**6**) as a white solid (0.28 g, 74%). [ $\alpha$ ]<sub>D</sub> –52.5 (c 0.008, CHCl<sub>3</sub>); *R*<sub>f</sub> = 0.6 in 1:2 hexanes-ethyl acetate; IR (neat, *v*, cm<sup>–1</sup>): 2926, 1681; <sup>1</sup>H NMR (400 MHz, CDCl<sub>3</sub>) δ 8.79 (s, 1H), 6.76 (d, *J* = 2.2 Hz, 1H), 6.62 – 6.52 (m, 2H), 5.71 (ddd, *J* = 9.9, 4.7, 1.5 Hz, 1H), 5.64 (dt, *J* = 9.8, 1.8 Hz, 1H), 3.69 (s, 3H), 3.37 (ddd, *J* = 15.9, 4.7, 1.4 Hz, 1H), 3.09 (dt, *J* = 15.9, 1.9 Hz, 1H), 3.01 – 2.92 (m, 1H), 2.66 – 2.54 (m, 2H), 2.48 (dd, *J* = 15.1, 1.8 Hz, 1H), 2.34 (d, *J* = 15.0 Hz, 1H), 2.06 – 1.98 (m, 1H), 1.74 (ddd, *J* = 11.7, 4.8, 1.3 Hz, 1H), 0.92 (dt, *J* = 14.9, 7.5 Hz, 1H), 0.79 (dq, *J* = 14.3, 7.3 Hz, 1H), 0.57 (t, *J* = 7.4 Hz, 3H); <sup>13</sup>C NMR (101 MHz, CDCl<sub>3</sub>) δ 169.2, 167.4, 150.4, 139.7, 136.8, 133.1, 124.8, 113.8, 110.1, 109.6, 91.3, 70.2, 55.5, 51.0, 51.0, 50.5, 44.4, 41.2, 28.6, 27.1, 7.5; HRMS (ESI<sup>+</sup>): calculated for C<sub>21</sub>H<sub>25</sub>N<sub>2</sub>O<sub>3</sub> [M+H]<sup>+</sup>: *m/z* = 353.1865, *m/z* found 353.1863.

#### (–)-Jerantinine A (**1**)<sup>2</sup>

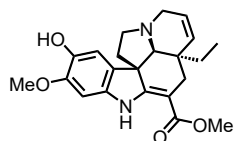

To a solution of (–)-melodinine P (**6**) (0.10 g, 0.26 mmol) in MeOH (2 mL) was added freshly prepared Ag<sub>2</sub>O (0.61 g, 2.61 mmol) in one portion. The reaction was allowed to stir for 8 h in dark. The reaction mixture was filtered through Celite®, then concentrated *in vacuo*. The residue was taken up in CH<sub>2</sub>Cl<sub>2</sub> (20 mL) was stirred with Na<sub>2</sub>S<sub>2</sub>O<sub>4</sub> (10% *aq*, 20 mL) for a further 15 min. The reaction mixture was further extracted with CH<sub>2</sub>Cl<sub>2</sub> (3 × 10 mL), and the combined organic layers dried over anhydrous Na<sub>2</sub>SO<sub>4</sub>, filtered, and concentrated *in vacuo*. Purification by flash column chromatography (0-50% EtOAc in hexanes) to afford (–)-jerantinine A (**1**) as an off-white solid (96 mg, 90%). [ $\alpha$ ]<sub>D</sub> –70.9 (c 0.010, CHCl<sub>3</sub>); *R*<sub>f</sub> = 0.5 in 1:1 hexanes-ethyl acetate; IR (neat, *v*, cm<sup>–1</sup>): 3548, 3379, 3035, 2965, 1669, 1605, 1110; <sup>1</sup>H NMR (400 MHz, CDCl<sub>3</sub>) δ 8.79 (s, 1H), 6.81 (s, 1H), 6.38 (s, 1H), 5.71 (ddd, *J* = 9.9, 4.7, 1.5 Hz, 1H), 5.68 – 5.59 (m, 1H), 5.24 (s, 1H), 3.80 (s, 3H), 3.69 (s, 3H), 3.38 (ddd, *J* = 15.8, 4.7, 1.5 Hz, 1H), 3.08 (dt, *J* = 15.9, 1.9 Hz, 1H), 2.99 – 2.91 (m, 1H), 2.60 (ddd, *J* = 11.1, 8.4, 4.7 Hz, 1H), 2.52 (d, *J* = 1.8 Hz, 1H), 2.46 (dd, *J* = 15.0, 1.9 Hz, 1H), 2.34 (d, *J* = 15.0 Hz, 1H), 2.03 – 1.98 (m, 1H), 1.69 (ddd, *J* = 11.5, 4.8, 1.1 Hz, 1H), 0.99 – 0.84 (m, 1H), 0.79 (dt, *J* = 14.0, 7.2 Hz, 1H), 0.56 (t, *J* = 7.4 Hz, 3H); <sup>13</sup>C NMR (101 MHz, CDCl<sub>3</sub>) δ 169.1, 167.9, 145.9, 139.9, 136.1, 133.1, 130.1, 124.9, 108.8, 94.6, 91.8, 70.2, 56.3, 55.3, 51.0, 50.9, 50.7, 44.4, 41.5, 28.3, 26.9, 7.5; HRMS (ESI<sup>+</sup>): calculated for C<sub>22</sub>H<sub>27</sub>N<sub>2</sub>O<sub>4</sub> [M+H]<sup>+</sup>: *m/z* = 383.1971, *m/z* found 383.1968.

### (–)-Jerantinine A fluorosulfate (7)

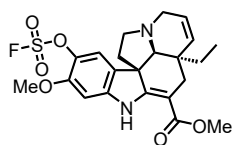

To a solution of (–)-jerantinine A (**1**) (22 mg, 0.057 mmol) in MeCN (5 mL) was added HMDS (17  $\mu$ L, 0.086 mmol), and BTMG (2  $\mu$ L, 0.011 mmol). To the above reaction mixture,  $\text{SO}_2\text{F}_2$  gas was bubbled in for 5 min, and the resultant reaction mixture was allowed to stir at room temperature for 3 h. The reaction mixture was concentrated *in vacuo* to afford (–)-jerantinine A fluorosulfate (**7**) as a sticky solid (27 mg, 100%).  $[\alpha]_{\text{D}} -35.2$  (c 0.007,  $\text{CHCl}_3$ );  $R_f = 0.7$  in 1:1 hexanes-ethyl acetate; IR (neat,  $\nu$ ,  $\text{cm}^{-1}$ ): 3363, 2928, 1677;  $^1\text{H NMR}$  (400 MHz,  $\text{CDCl}_3$ )  $\delta$  9.00 (s, 1H), 7.08 (s, 1H), 6.46 (s, 1H), 5.72 (ddd,  $J = 9.9, 4.8, 1.5$  Hz, 1H), 5.62 (dt,  $J = 10.0, 1.9$  Hz, 1H), 3.82 (s, 3H), 3.70 (s, 3H), 3.38 (ddd,  $J = 16.0, 4.8, 1.5$  Hz, 1H), 3.13 (dt,  $J = 15.9, 2.0$  Hz, 1H), 3.02 – 2.94 (m, 1H), 2.59 (ddd,  $J = 10.6, 8.6, 4.9$  Hz, 1H), 2.55 – 2.41 (m, 2H), 2.33 (d,  $J = 15.2$  Hz, 1H), 2.03 – 1.97 (m, 1H), 1.74 (ddd,  $J = 11.7, 5.0, 1.5$  Hz, 1H), 0.91 (dt,  $J = 15.0, 7.6$  Hz, 1H), 0.85 – 0.77 (m, 1H), 0.58 (t,  $J = 7.4$  Hz, 3H);  $^{13}\text{C NMR}$  (101 MHz,  $\text{CDCl}_3$ )  $\delta$  169.0, 166.0, 151.6, 144.0, 132.8, 129.8, 128.5, 125.0, 116.0, 95.4, 94.2, 70.2, 56.6, 54.9, 51.4, 51.1, 50.4, 44.6, 41.1, 28.8, 27.3, 7.6;  $^{19}\text{F NMR}$  (377 MHz,  $\text{CDCl}_3$ )  $\delta$  38.78; HRMS (ESI $^+$ ): calculated for  $\text{C}_{22}\text{H}_{26}\text{FN}_2\text{O}_6\text{S}$  [M+H] $^+$ :  $m/z = 465.1495$ ,  $m/z$  found 465.1498.

### (–)-Melodinine P fluorosulfate (8)

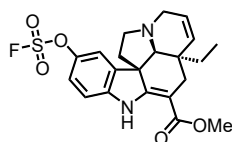

To a solution of (–)-melodinine P (**6**) (0.10 g, 0.28 mmol) in MeCN (25 mL) was added HMDS (65  $\mu$ L, 0.31 mmol), and BTMG (11  $\mu$ L, 0.06 mmol). To the above reaction mixture,  $\text{SO}_2\text{F}_2$  gas was bubbled in for 30 min, and the resultant reaction mixture was allowed to stir at room temperature for 16 h. The reaction mixture was concentrated *in vacuo* and the residue taken up in EtOAc (30 mL), washed with  $\text{H}_2\text{O}$  (20 mL). The separated aqueous layer was further extracted EtOAc ( $3 \times 10$  mL). The combined organic layers were washed with  $\text{H}_2\text{O}$  ( $3 \times 20$  mL), brine (20 mL), dried over anhydrous  $\text{Na}_2\text{SO}_4$ , filtered, and concentrated *in vacuo*. Purification by flash column chromatography (0–20% EtOAc in hexanes) to afford (–)-melodinine P fluorosulfate (**8**) as a colorless oil (0.12 g, 100%).  $[\alpha]_{\text{D}} -44.8$  (c 0.005,  $\text{CHCl}_3$ );  $R_f = 0.8$  in 4:1 hexanes-ethyl acetate; IR (neat,  $\nu$ ,  $\text{cm}^{-1}$ ): 3366, 2963, 1679, 1615, 1475, 1448, 1268, 1231, 1117;  $^1\text{H NMR}$  (400 MHz,  $\text{CDCl}_3$ )  $\delta$  9.08 (s, 1H), 7.20 (d,  $J = 3.0$  Hz, 1H), 7.12 (dd,  $J = 8.5, 3.0$  Hz, 1H), 6.82 (d,  $J = 8.5$  Hz, 1H), 5.80 (ddd,  $J = 10.0, 5.2, 1.8$  Hz, 1H), 5.70 (dt,  $J = 10.0, 1.8$  Hz, 1H), 3.77 (s, 3H), 3.46 (dd,  $J = 16.0, 5.2$  Hz, 1H), 3.21 (d,  $J = 16.0$  Hz, 1H), 3.07 (t,  $J = 7.5$  Hz, 1H), 2.72 – 2.66 (m, 2H), 2.56 (dd,  $J = 15.2, 1.9$  Hz, 1H), 2.41 (d,  $J = 15.3$  Hz, 1H), 2.12 – 2.04 (m, 1H), 1.87 – 1.82 (m, 1H), 1.02 – 0.86 (m, 2H), 0.65 (t,  $J = 7.5$  Hz, 3H);  $^{13}\text{C NMR}$  (101 MHz,  $\text{CDCl}_3$ )  $\delta$  168.7, 165.4, 144.0, 143.2, 140.0, 132.6, 124.8, 120.3, 114.9, 109.5, 94.0, 70.0, 55.2, 51.2, 51.0, 50.2, 44.5, 40.8, 28.8, 27.2, 7.5;  $^{19}\text{F NMR}$  (377 MHz,  $\text{CDCl}_3$ )  $\delta$  35.97; HRMS (ESI $^+$ ): calculated for  $\text{C}_{21}\text{H}_{24}\text{FN}_2\text{O}_5\text{S}$  [M+H] $^+$ :  $m/z = 435.1384$ ,  $m/z$  found 435.1379.

### (–)-Jerantinine A iminoquinone (9)

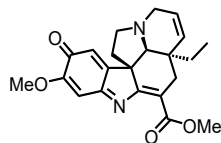

To a solution of (–)-jerantinine A (**1**) (10 mg, 0.03 mmol) in  $\text{CDCl}_3$  (2 mL) was added  $\text{Ag}_2\text{O}$  (60 mg, 0.26 mmol) at room temperature in one portion. The reaction was allowed to stir for 15 min in dark. The reaction mixture was filtered, and the filtrate concentrated *in vacuo* to afford (–)-jerantinine A iminoquinone (**9**) as a dark brown oil (10 mg, 100%).  $[\alpha]_{\text{D}} -36.1$  (c 0.010,  $\text{CHCl}_3$ );  $R_f = 0.05$  in 1:1 hexanes-ethyl acetate (degrades); IR (neat,  $\nu$ ,  $\text{cm}^{-1}$ ): 2962, 2921, 1696, 1645, 1578, 1225, 1164;  $^1\text{H NMR}$  (400 MHz,  $\text{CDCl}_3$ )  $\delta$  6.70 (s, 1H), 6.29 (s, 1H), 5.82 – 5.77 (m, 1H), 5.66 – 5.62 (m, 1H), 3.88 (s, 3H), 3.87 (s, 3H), 3.48 – 3.43 (m, 1H), 3.12 – 3.04 (m, 2H), 2.77 – 2.68 (m, 2H), 2.53 – 2.47 (m, 1H), 2.42 (s, 1H), 2.17 – 2.09 (m, 1H), 1.82 (dd,  $J = 11.9, 4.3$  Hz, 1H), 0.98 – 0.85 (m, 2H), 0.73 (t,  $J = 7.4$  Hz, 3H);  $^{13}\text{C NMR}$  (101 MHz,  $\text{CDCl}_3$ )  $\delta$  181.1, 168.2, 167.4, 166.1, 158.1, 157.4, 132.1, 125.8, 120.5, 118.6, 104.3, 70.2, 56.5, 54.8, 52.5, 51.2, 50.8, 45.0, 43.0, 32.7, 27.3, 7.7; HRMS (ESI $^+$ ): calculated for  $\text{C}_{22}\text{H}_{25}\text{N}_2\text{O}_4$  [M+H] $^+$ :  $m/z = 383.1809$ ,  $m/z$  found 381.1808.

**(–)-Jerantinine A acetate (2)**<sup>3</sup>

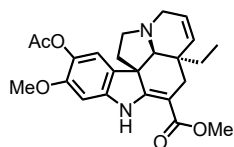

A solution of (–)-jerantinine A (**1**) (0.11 g, 0.29 mmol) in Ac<sub>2</sub>O-pyridine (1:1 v/v, 3 mL) was stirred at room temperature for 15 min. The reaction mixture was then diluted with water (10 mL), the pH adjusted to 10 with Na<sub>2</sub>CO<sub>3</sub> (sat. aq, ca. 20 mL) and then extracted with CH<sub>2</sub>Cl<sub>2</sub> (4 × 20 mL). The combined organic fractions were dried over anhydrous Na<sub>2</sub>SO<sub>4</sub>, filtered and concentrated *in vacuo*. Purification by flash column chromatography (0-50% EtOAc in hexanes) to afford (–)-jerantinine A acetate (**2**) as an off-white solid (90 mg, 74%). [ $\alpha$ ]<sub>D</sub> –46.1 (c 0.004, CHCl<sub>3</sub>); *R*<sub>f</sub> = 0.5 in 1:1 hexanes-ethyl acetate; IR (neat, ν, cm<sup>–1</sup>): 3364, 2962, 1762, 1675, 1614, 1494, 1456, 1368, 1262, 1156, 1109; <sup>1</sup>H NMR (400 MHz, CDCl<sub>3</sub>) δ 8.97 (s, 1H), 6.92 (s, 1H), 6.50 (s, 1H), 5.79 – 5.75 (m, 1H), 5.69 (d, *J* = 10.1 Hz, 1H), 3.81 (s, 3H), 3.76 (s, 3H), 3.44 – 3.40 (m, 1H), 3.16 (d, *J* = 15.9 Hz, 1H), 3.02 (t, *J* = 6.8 Hz, 1H), 2.66 – 2.61 (m, 2H), 2.54 (d, *J* = 15.0 Hz, 1H), 2.38 (d, *J* = 15.0 Hz, 1H), 2.30 (s, 3H), 2.06 – 2.01 (m, 1H), 1.84 (dd, *J* = 12.0, 3.5 Hz, 1H), 1.03 – 0.82 (m, 2H), 0.64 (t, *J* = 7.4 Hz, 3H); <sup>13</sup>C NMR (101 MHz, CDCl<sub>3</sub>) δ 169.6, 169.1, 167.1, 151.2, 141.8, 133.5, 133.1, 129.6, 124.9, 116.5, 95.2, 92.9, 70.3, 56.3, 55.2, 51.2, 51.2, 50.5, 44.4, 41.2, 28.8, 27.3, 20.8, 7.6; HRMS (ESI<sup>+</sup>): calculated for C<sub>24</sub>H<sub>29</sub>N<sub>2</sub>O<sub>5</sub> [M+H]<sup>+</sup>: *m/z* = 425.2071, *m/z* found 425.2068.

# Biological Evaluations of (–)-Jerantinine A, (–)-Melodinine P, and Derivatives

## Cell culture

MDA-MB-231 breast cancer cells and MCF-10A human mammary epithelial cells were purchased from ATCC and cultured in a humidified incubator with 5% CO<sub>2</sub> at 37°C. MDA-MB-231 cells were cultured in RPMI-1640 plus 10% FBS. MCF-10A cells were cultured in DMEM/F12 medium supplemented with 5% horse serum, 20ng/ml epidermal growth factor, 0.5mg/ml hydrocortisone, 100 ng/ml cholera toxin, and 10 µg/ml insulin.

## Cell proliferation assay

MDA-MB-231 breast cancer cells were seeded in 96-well black plates at a density of 2000 cells per well and then incubated with the indicated drug concentrations. The medium was changed every two to three days. On day 5, the viability was assessed using the CyQUANT proliferation assay (Thermo C35013), a fluorescence-based measurement of cellular DNA content, according to manufacture instruction.

## Construction of oxidative stress reporter

Lentivirus-based oxidative stress reporter was described previously<sup>4</sup>. Briefly, the Nrf2 degron was conjugated to the N-terminus of green luciferase (CBG99) to indicate oxidative stress and constitutively-expressed red luciferase (PRE9) was used as an imaging internal control. Red fluorescence from mStrawberry expression was used for the positive selection of reporter gene-transduced cells. All of the gene cassettes were built into a single lentiviral vector (pBOB lentiviral backbone). Reporter genes (CBG99, PRE9 and mStrawberry) and NRF2 protein degron sequences were all synthesized from GenScript USA (New Jersey).

## The generation of oxidative stress reporter expressing cells

The three lentiviral packaging plasmids (pMDL, pRSV-REV, pCMV-VSVG) and the lentiviral oxidative stress reporter plasmid (OxiLuc) were transfected into HEK293T packaging cells with Lipofectamine 3000 (Invitrogen, Waltham, MA; according to the manufacturer's recommended protocol) to produce OxiLuc lentivirus<sup>5</sup>. Lentiviral supernatant was then collected 48 hours and 72 hours later, aliquoted and stored at -80°C. MDA-MB-231 cells were seeded on a 6 well plate at a density of 3x10<sup>5</sup> cells/well and transduced with 500 µL of OxiLuc lentiviral supernatant plus polybrene to a final concentration of 8 µg/mL. After expanding the transduced cells, FACS sorting was performed for red fluorescence and mStrawberry expression (BD-FACS Aria, BD Bioscience, Franklin Lakes, NJ) to select for MDA-MB-231 cells stably transduced with OxiLuc expression.

## Oxidative stress imaging and drug treatment *in vitro*

Images of oxidative stress were taken with an IVIS Spectrum scanner (Perkin Elmer) as previously described<sup>4</sup>. 5x10<sup>3</sup> MDA-MB231/OxiLuc cells were plated day -1 on a black-walled 96 well plate (Cellvis, Mountain View, CA). The next day, the cells were treated with escalating doses of MP, JA, and the fluorosulfate of both molecules for 24 hours. 24 hours after drug treatment, multiple bioluminescent images were acquired 2 minutes after adding 150 µg/mL of D-Luciferin (Goldbio, Saint Louis, MO), through a series of 20 nm bandpass optical filters, ranging from 520 to 660 nm. Using single-color CBG99 and PRE9 reference spectra, green and red emitted light was spectrally-unmixed using the Imaging Wizard in Living Imaging software 4.0 (Perkin Elmer). All *in vitro* images were acquired at field-of-view C and focused at 0.5 cm subject height. Photon flux from each well was quantified as photons/second/steradian/cm<sup>2</sup>.

## Metabolomics

MDA-MB-231 breast cancer cells were treated for 16 hours with vehicle (DMSO), 5 µM jerantinine A, or 5 µM jerantinine A fluorosulfate to perform untargeted metabolic profiling. A water solution containing 50% (v/v) methanol and 20% (v/v) acetonitrile was used to extract cell lysate. The supernatant was collected, transferred into glass vials, and stored at -80°C before being analyzed by mass spectrometry (MS). For the MS analysis, an Orbitrap Q Exactive HF (Thermo Fisher Scientific) with a HESI probe was used. Each polarity's mass was calibrated prior to analysis. Principal component analysis (PCA), clustered heatmap analysis, and metabolite set enrichment analysis were all performed using MetaboAnalyst 5.0 (<http://www.metaboanalyst.ca>).

**Table S1.** Previously reported anticancer activity of (–)-jerantinine A (**1**).

| Cell line  | Description                                                                            | Activity                                | Reference                                                                | Notes                                                                                                                                                               |
|------------|----------------------------------------------------------------------------------------|-----------------------------------------|--------------------------------------------------------------------------|---------------------------------------------------------------------------------------------------------------------------------------------------------------------|
| KB/S       | Keratin-forming tumor cell line<br>HeLa                                                | IC <sub>50</sub> = 0.76 µg/mL (1.99 µM) | <i>J. Nat. Prod.</i> , <b>2008</b> , <i>71</i> , 1591–1594               |                                                                                                                                                                     |
| KB/VJ300   | Vincristine-resistant KB cells                                                         | IC <sub>50</sub> = 0.66 µg/mL (1.73 µM) | <i>J. Nat. Prod.</i> , <b>2008</b> , <i>71</i> , 1591–1594               |                                                                                                                                                                     |
| A549       | Adenocarcinomic human alveolar basal epithelial cells                                  | GI <sub>50</sub> = 3.741 ± 0.65 µM      | <i>Investig. New Drugs</i> , <b>2014</b> , <i>32</i> , 838–850           |                                                                                                                                                                     |
| HCT-116    | Human colorectal carcinoma cell line                                                   | GI <sub>50</sub> = 0.762 ± 0.13 µM      | <i>Investig. New Drugs</i> , <b>2014</b> , <i>32</i> , 838–850           |                                                                                                                                                                     |
| HT-29      | Human colorectal adenocarcinoma cell line with epithelial morphology                   | GI <sub>50</sub> = 2.520 ± 0.28 µM      | <i>Investig. New Drugs</i> , <b>2014</b> , <i>32</i> , 838–850           |                                                                                                                                                                     |
| MCF-7      | Human breast cancer cell line with estrogen, progesterone and glucocorticoid receptors | GI <sub>50</sub> = 0.853 ± 0.09 µM      | <i>Investig. New Drugs</i> , <b>2014</b> , <i>32</i> , 838–850           |                                                                                                                                                                     |
| MDA-MB-468 | Human breast cancer cell line with upregulated EGF receptors                           | GI <sub>50</sub> = 0.8503 ± 0.07 µM     | <i>Investig. New Drugs</i> , <b>2014</b> , <i>32</i> , 838–850           |                                                                                                                                                                     |
| MRC-5      | Human fetal lung fibroblast cells                                                      | GI <sub>50</sub> = 1.723 ± 0.67 µM      | <i>Investig. New Drugs</i> , <b>2014</b> , <i>32</i> , 838–850           |                                                                                                                                                                     |
| MCF-7      | Human breast cancer with estrogen, progesterone, and glucocorticoid receptors          | IC <sub>50</sub> = 1.22 ± 0.15 µM       | <i>Scientific Reports</i> <b>volume 7</b> , Article number: 42504 (2017) | Non-transformed cells were found to be significantly more resistant to <b>JA</b> treatment and apoptotic morphological changes were not noted in MCF-10A cell line. |
| T47D       | Human breast                                                                           | IC <sub>50</sub> = 0.72 ± 0.18 µM       | <i>Scientific Reports</i> <b>volume 7</b> ,                              |                                                                                                                                                                     |

|            |                                                                                                            |                                                                                                                                                                                |                                                                          |                                                                                                                                                                                                                                                                                                     |
|------------|------------------------------------------------------------------------------------------------------------|--------------------------------------------------------------------------------------------------------------------------------------------------------------------------------|--------------------------------------------------------------------------|-----------------------------------------------------------------------------------------------------------------------------------------------------------------------------------------------------------------------------------------------------------------------------------------------------|
|            | cancer with significant resistance to estrogens and antiestrogens                                          |                                                                                                                                                                                | Article number: 42504 (2017)                                             | Rapid induction of apoptosis could imply endogenous proteins are targeted.                                                                                                                                                                                                                          |
| MDA-MB-468 | Triple negative breast cancer (TNBC) cell line                                                             | IC <sub>50</sub> = 0.86 ± 0.09 µM                                                                                                                                              | <i>Scientific Reports</i> <b>volume 7</b> , Article number: 42504 (2017) | 509 upregulated proteins, 429 down-regulated.                                                                                                                                                                                                                                                       |
| MCF-10A    | Non-transformed human mammary epithelial cells bearing a Zinc-Finger Nuclease (ZFN) knock out modification | IC <sub>50</sub> = >10 µM                                                                                                                                                      | <i>Scientific Reports</i> <b>volume 7</b> , Article number: 42504 (2017) | <b>JA</b> triggers dysregulation of SF3B1 and SF3B3 proteins, causing pre-mRNA splicing errors. This induced apoptosis.                                                                                                                                                                             |
| U87MG      | Human primary glioblastoma                                                                                 | IC <sub>50</sub> = 0.62 ± 1.19 µg/mL (1.62 ± 3.11 µM)<br><br>IC <sub>50</sub> = 1.29 ± 1.26 µg/mL g-T3 combined with 0.16 µg/mL (0.42 µM) <b>JA</b> , CI = 0.67 <sup>[x]</sup> | <i>Phytomedicine</i> <b>PHYMED</b> 5217 (2017)                           | A significant decrease in the toxicity to normal MRC5 cells was observed when <b>JA</b> was coadministered with g-T3.                                                                                                                                                                               |
| MRC5       | Normal fetal lung fibroblast cells                                                                         | IC <sub>50</sub> = 0.97 ± 0.11 µg/mL (2.54 ± 0.29 µM)<br><br>IC <sub>50</sub> = 6.55 ± 1.13 µg/mL g-T3 combined with 0.16 µg/mL (0.42 µM)                                      |                                                                          | <b>JA</b> treatment resulted in cell cycle arrest at the G2/M phase while coadministering <b>JA</b> and g-T3 caused G0/G1 arrest.<br><br><b>JA</b> treatment caused disruption of microtubule networks and triggered FAAs- and p53-induced apoptosis via death receptor and mitochondrial pathways. |
| HCT116     | Human colorectal carcinoma                                                                                 | GI <sub>50</sub> = 0.82 ± 0.07 µM                                                                                                                                              | <i>Scientific Reports</i> <b>volume 8</b> , Article number: 10617 (2018) | <b>JA</b> induced cell cycle arrest at the G2/M phase.                                                                                                                                                                                                                                              |
| MCF-7      | Human breast cancer with estrogen, progesterone and glucocorticoid receptors                               | GI <sub>50</sub> = 0.81 ± 0.07 µM                                                                                                                                              | <i>Scientific Reports</i> <b>volume 8</b> , Article number: 10617 (2018) | <b>JA</b> prevents tubulin polymerization <i>in vitro</i> .<br><br><b>JA</b> also caused the formation of multipolar spindles, misaligned chromosomes, multinucleation, and nuclear fragmentation.                                                                                                  |
| MCF-7      | Human breast cancer with                                                                                   | 96 h of exposure, decrease in cell density                                                                                                                                     | <i>Scientific Reports</i> <b>volume 8</b> , Article number: 10617 (2018) |                                                                                                                                                                                                                                                                                                     |



|                          |                                                                                   |                                                                                                                                                                                                                                                                                                                        |                                                                          |                                                                                                                                                                                                                                                      |
|--------------------------|-----------------------------------------------------------------------------------|------------------------------------------------------------------------------------------------------------------------------------------------------------------------------------------------------------------------------------------------------------------------------------------------------------------------|--------------------------------------------------------------------------|------------------------------------------------------------------------------------------------------------------------------------------------------------------------------------------------------------------------------------------------------|
|                          | estrogen, progesterone and glucocorticoid receptors                               | (3D culture)                                                                                                                                                                                                                                                                                                           |                                                                          | Tubulin-jerantinine B acetate crystal structure obtained.                                                                                                                                                                                            |
| MDA-MB-231               | Epithelial cell line isolated from the breast tissue of an adenocarcinoma patient | 96 h of exposure, decrease in cell density<br>And a decrease in the invasive nature of this cell line (3D culture)                                                                                                                                                                                                     | <i>Scientific Reports</i> <b>volume 8</b> , Article number: 10617 (2018) |                                                                                                                                                                                                                                                      |
| A549                     | Human lung adenocarcinoma                                                         | IC <sub>20</sub> = 0.35 ± 0.32 µg/mL (0.92 ± 0.84 µM)<br><br>IC <sub>50</sub> = 1.42 ± 1.31 µg/mL (3.71 ± 3.43 µM)<br><br>IC <sub>50</sub> = 2.77 ± 1.09 µg/mL d-T3 combined with 0.35 µg/mL (0.92 µM) <b>JA</b> , CI = 0.47 <sup>[x]</sup><br><br>Vinblastine (positive control) IC <sub>50</sub> = 0.03 ± 1.45 µg/mL | <i>J. Herbmed. Pharmacol.</i> 2019, 8, 333                               | <b>JA</b> caused cell shrinkage in A549 cells due to microtubule disruption.<br><br><b>JA</b> induced caspase 8, 9, and 3, enzymatic activities. Combined treatment with d-T3 boosted caspase 9 and 3 activities (1.90- and 1.95-fold respectively). |
| MRC5                     | Normal fetal lung fibroblast cells                                                | IC <sub>20</sub> = 0.35 ± 0.32 µg/mL (0.92 ± 0.84 µM)<br><br>IC <sub>50</sub> = 0.97 ± 0.11 µg/mL (2.54 ± 0.29 µM)<br><br>IC <sub>50</sub> = 5.57 ± 1.22 µg/mL d-T3 combined with 0.35 µg/mL (0.92 µM) <b>JA</b>                                                                                                       | <i>J. Herbmed. Pharmacol.</i> 2019, 8, 333                               | <b>JA</b> induced similar levels of toxicity to A549 and normal MRC5 when used alone. When combined with d-T3, 2-fold selective toxicity as observed.                                                                                                |
| PC3                      | Human prostate cancer                                                             | EC <sub>50</sub> = 2.8 ± 0.7 µM ( <b>JA</b> )<br>EC <sub>50</sub> = 20.9 ± 2.7 µM ( <b>MP</b> )<br>EC <sub>50</sub> = 76.0 ± 10.1 µM ( <b>TAB</b> )                                                                                                                                                                    | <i>Org. Biomol. Chem.</i> , <b>2022</b> , 20, 3988-3997                  | Antitumor activities enhanced with hydroxy/methoxy derivatizations on indole-ring.                                                                                                                                                                   |
| SKBR-3<br><br>MDA-MB-231 | TfR1+ breast cancers                                                              | GI <sub>50</sub> = 0.02-0.15 µM (Apoferitin (Aft)- <b>JA-Ac</b> )                                                                                                                                                                                                                                                      | <i>ACS Omega</i> , <b>2022</b> , 7, 21473–21482                          | Aft acts as a biocompatible vehicle for targeted delivery of <b>JA-Ac</b> , offering potential to minimize toxicity and enhance <b>JA-Ac</b> activity in TfR1-expressing tumors.                                                                     |

IC<sub>50</sub> = half maximal inhibitory concentration.

GI<sub>50</sub> = half maximal growth inhibition.

EC<sub>50</sub> = half maximal effective concentration.

<sup>[x]</sup>CI = combination index, CI < 1 suggests synergistic effect

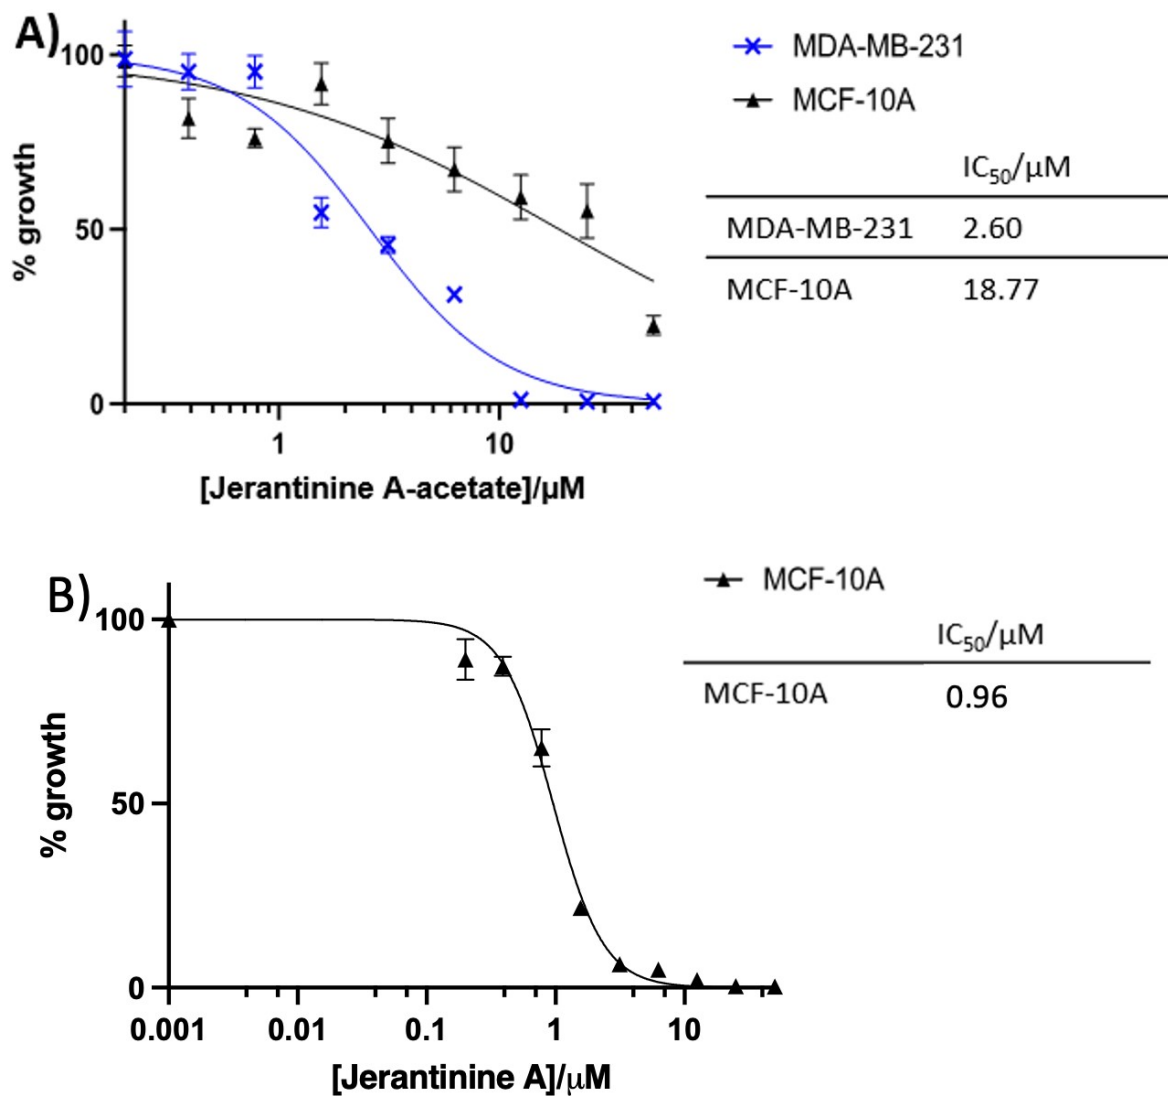

**Figure S1. A)** Growth inhibitory effect of (–)-jerantinine A acetate in MDA-MB-231 breast cancer cell line and non-transformed MCF-10A cell line. **B)** Growth inhibitory effect of (–)-jerantinine A in non-transformed MCF-10A cell line. Cell numbers were quantified by CyQUANT assay after 5 days treatment of indicated concentrations (error bars indicate SEM; n=6).  $IC_{50}$  values were calculated using GraphPad Prism.

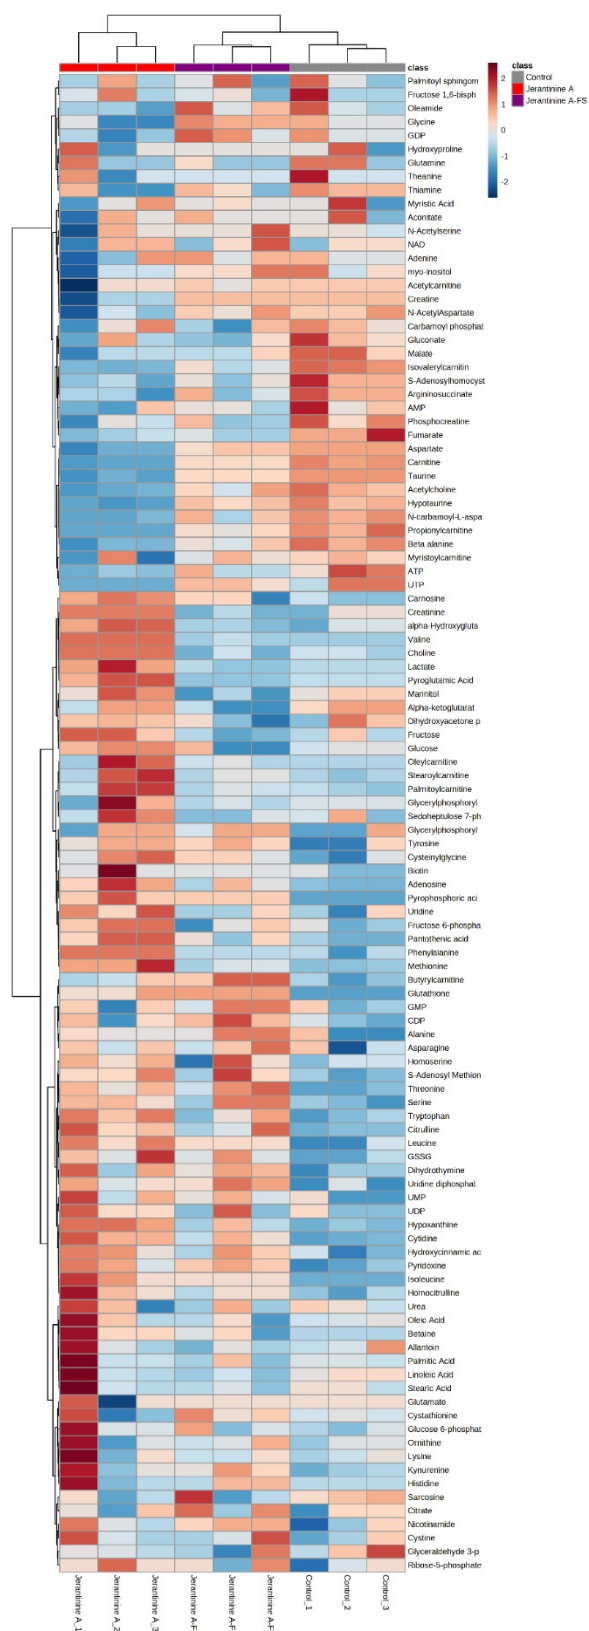

**Figure S2.** Clustered heatmap of all the normalized metabolites between groups of 5  $\mu$ M (–)jerantinine A, 5  $\mu$ M (–)jerantinine A fluorosulfate, and vehicle control.

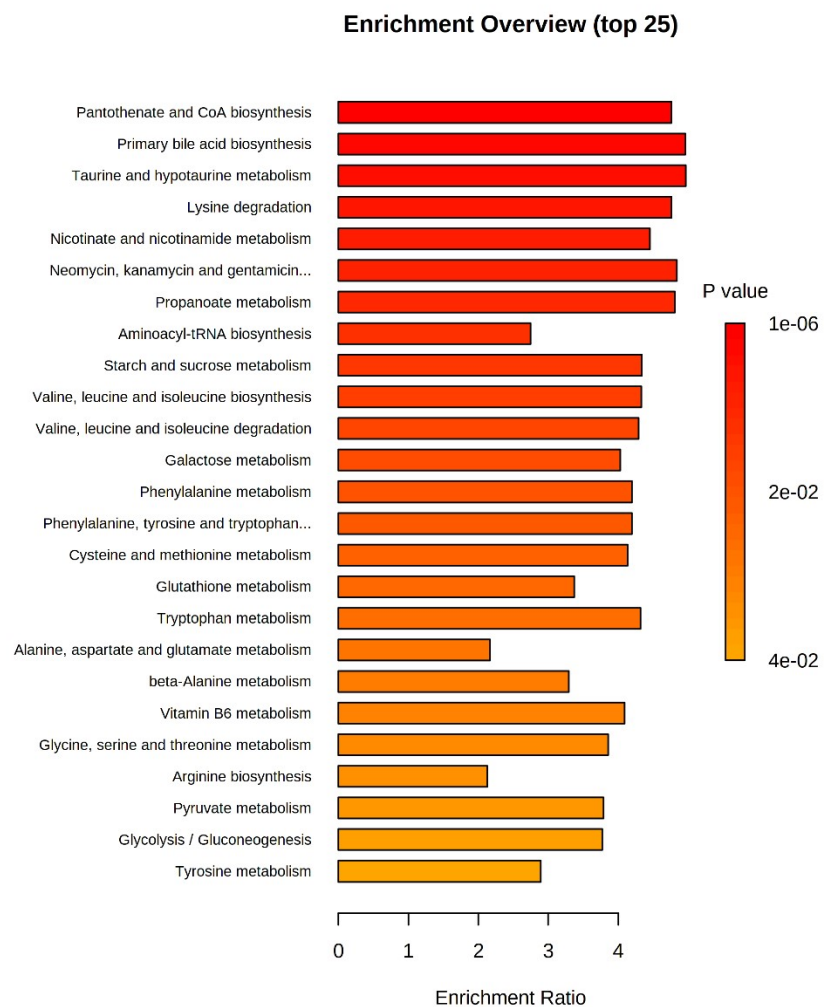

**Figure S3.** Overview of top 25 enriched metabolite sets between control and 5  $\mu$ M (–)-jerantinine A.

**Table S2.** Metabolite set enrichment analysis of (–)-jerantinine A treated MDA-MB-231 cells.

|                                                            | <i>Total<br/>Cmpd</i> | <i>Hits</i> | <i>Statistic<br/>Q</i> | <i>Expected<br/>Q</i> | <i>Raw p</i> | <i>Holm p</i> | <i>FDR</i> |
|------------------------------------------------------------|-----------------------|-------------|------------------------|-----------------------|--------------|---------------|------------|
| <i>Pantothenate and CoA biosynthesis</i>                   | 19                    | 4           | 95.182                 | 20                    | 1.32E-06     | 6.98E-05      | 6.98E-05   |
| <i>Primary bile acid biosynthesis</i>                      | 46                    | 2           | 99.25                  | 20                    | 1.30E-05     | 0.000674      | 0.000233   |
| <i>Taurine and hypotaurine metabolism</i>                  | 8                     | 2           | 99.391                 | 20                    | 1.32E-05     | 0.000674      | 0.000233   |
| <i>Lysine degradation</i>                                  | 25                    | 2           | 95.174                 | 20                    | 3.99E-05     | 0.001996      | 0.000529   |
| <i>Nicotinate and nicotinamide metabolism</i>              | 15                    | 3           | 89.057                 | 20                    | 0.000283     | 0.01387       | 0.003001   |
| <i>Neomycin, kanamycin and gentamicin biosynthesis</i>     | 2                     | 2           | 96.793                 | 20                    | 0.00034      | 0.016316      | 0.003003   |
| <i>Propanoate metabolism</i>                               | 23                    | 1           | 96.201                 | 20                    | 0.000548     | 0.025767      | 0.004151   |
| <i>Aminoacyl-tRNA biosynthesis</i>                         | 48                    | 16          | 54.898                 | 20                    | 0.000848     | 0.039031      | 0.005214   |
| <i>Starch and sucrose metabolism</i>                       | 18                    | 4           | 86.692                 | 20                    | 0.000885     | 0.03984       | 0.005214   |
| <i>Valine, leucine and isoleucine biosynthesis</i>         | 8                     | 4           | 86.591                 | 20                    | 0.001569     | 0.069044      | 0.007685   |
| <i>Valine, leucine and isoleucine degradation</i>          | 40                    | 3           | 85.788                 | 20                    | 0.001721     | 0.074009      | 0.007685   |
| <i>Galactose metabolism</i>                                | 27                    | 5           | 80.62                  | 20                    | 0.00174      | 0.074009      | 0.007685   |
| <i>Phenylalanine metabolism</i>                            | 10                    | 2           | 83.902                 | 20                    | 0.002494     | 0.10226       | 0.009442   |
| <i>Phenylalanine, tyrosine and tryptophan biosynthesis</i> | 4                     | 2           | 83.902                 | 20                    | 0.002494     | 0.10226       | 0.009442   |
| <i>Cysteine and methionine metabolism</i>                  | 33                    | 5           | 82.732                 | 20                    | 0.004003     | 0.15612       | 0.013546   |
| <i>Glutathione metabolism</i>                              | 28                    | 7           | 67.45                  | 20                    | 0.004089     | 0.15612       | 0.013546   |
| <i>Tryptophan metabolism</i>                               | 41                    | 2           | 86.439                 | 20                    | 0.005108     | 0.189         | 0.015925   |
| <i>Alanine, aspartate and glutamate metabolism</i>         | 28                    | 12          | 43.366                 | 20                    | 0.006166     | 0.22197       | 0.018155   |
| <i>beta-Alanine metabolism</i>                             | 21                    | 4           | 65.852                 | 20                    | 0.008721     | 0.30522       | 0.024326   |
| <i>Vitamin B6 metabolism</i>                               | 9                     | 1           | 81.852                 | 20                    | 0.013184     | 0.44827       | 0.034939   |
| <i>Glycine, serine and threonine metabolism</i>            | 33                    | 7           | 77.151                 | 20                    | 0.015684     | 0.51756       | 0.039583   |
| <i>Arginine biosynthesis</i>                               | 14                    | 10          | 42.523                 | 20                    | 0.020679     | 0.66174       | 0.049818   |
| <i>Pyruvate metabolism</i>                                 | 22                    | 2           | 75.84                  | 20                    | 0.02276      | 0.70555       | 0.052446   |
| <i>Glycolysis / Gluconeogenesis</i>                        | 26                    | 4           | 75.495                 | 20                    | 0.024061     | 0.72183       | 0.053135   |
| <i>Tyrosine metabolism</i>                                 | 42                    | 2           | 57.879                 | 20                    | 0.035747     | 1             | 0.075785   |
| <i>Histidine metabolism</i>                                | 16                    | 4           | 43.018                 | 20                    | 0.042103     | 1             | 0.085825   |
| <i>Amino sugar and nucleotide sugar metabolism</i>         | 37                    | 4           | 65.77                  | 20                    | 0.045227     | 1             | 0.08878    |
| <i>Fructose and mannose metabolism</i>                     | 20                    | 3           | 64.827                 | 20                    | 0.047539     | 1             | 0.089984   |

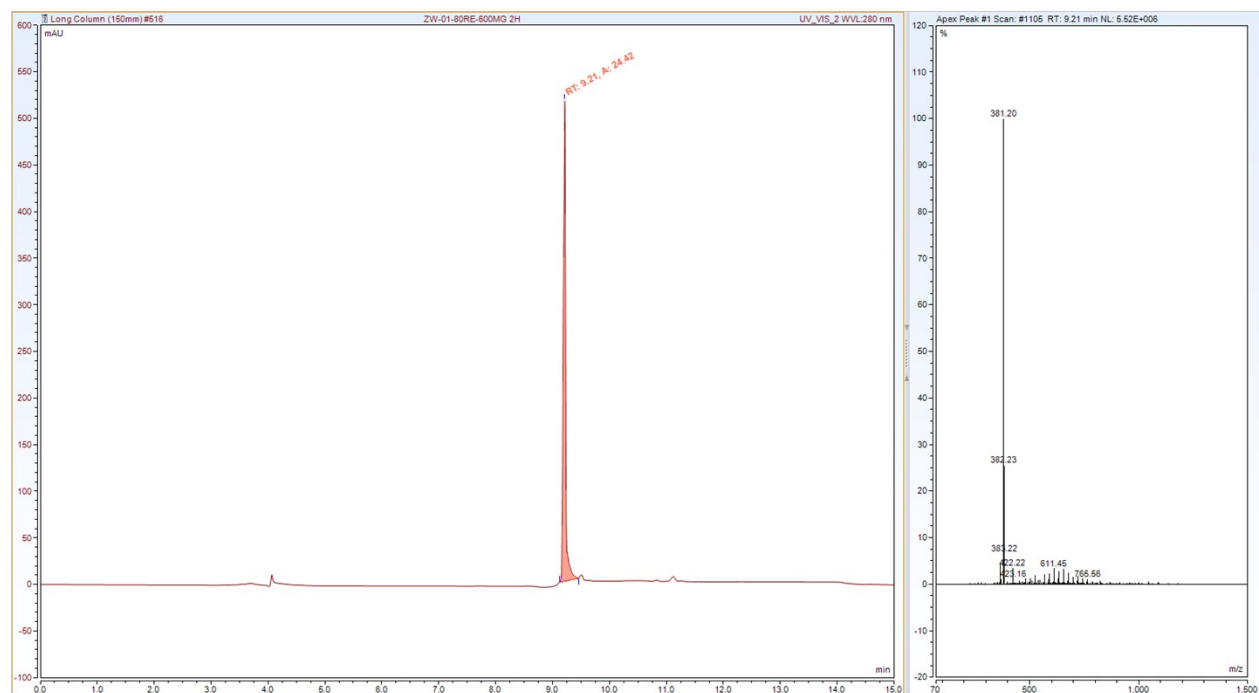

**Figure S4.** LC-MS chromatogram of oxidation of (-)-melodinine P using Ag<sub>2</sub>O to (-)-jerantinine A iminoquinone.

# NMR spectra of synthesized compounds

## (-)-15-Iodo-tabersonine (4)

<sup>1</sup>H NMR (400 MHz, CDCl<sub>3</sub>)

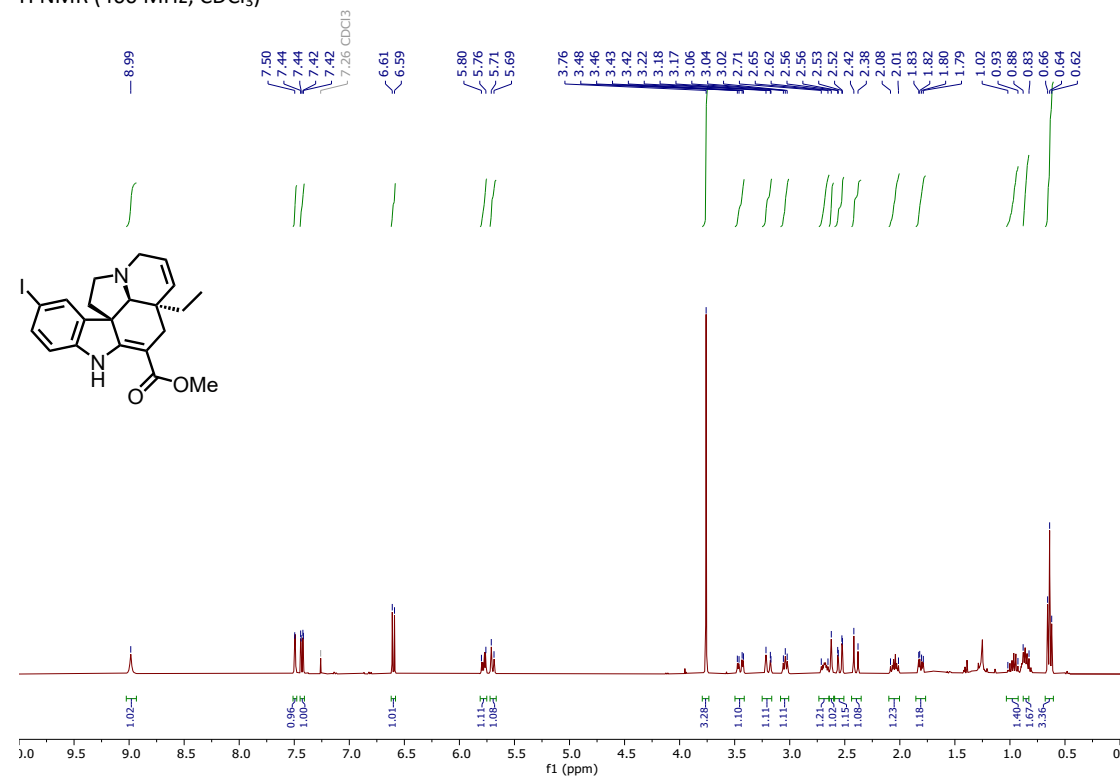

<sup>13</sup>C NMR (101 MHz, CDCl<sub>3</sub>)

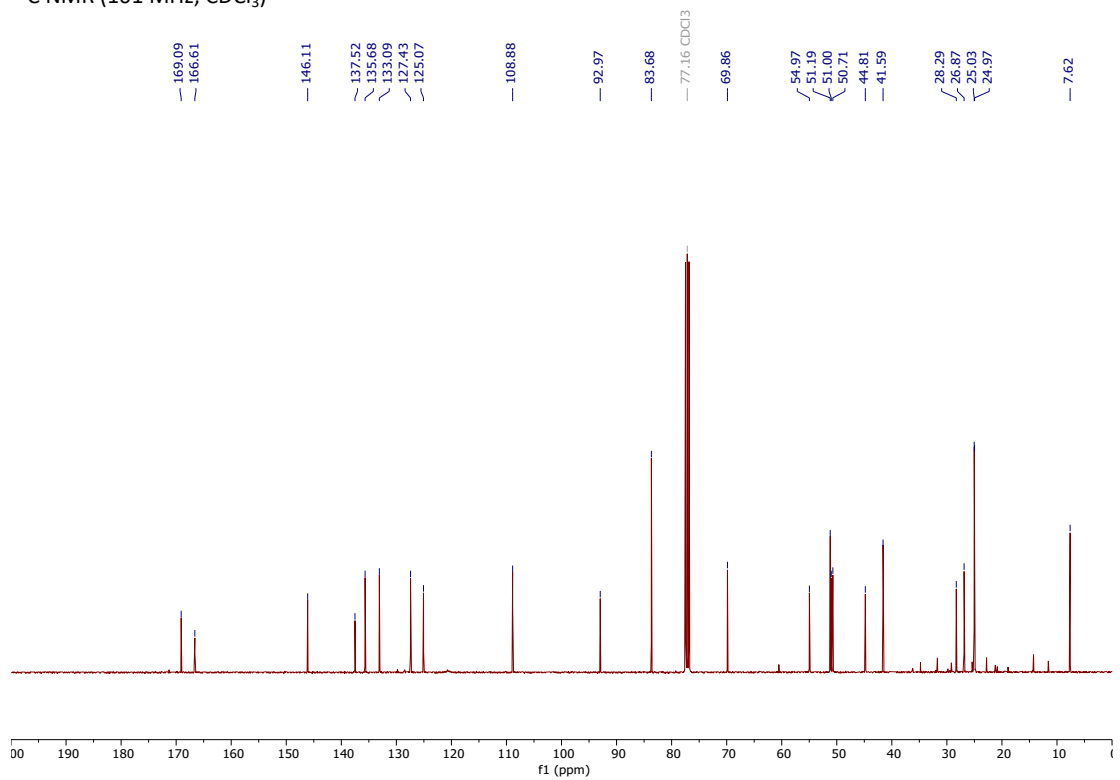

**(-)-15-BPin-tabersonine (5)**

$^1\text{H}$  NMR (400 MHz,  $\text{CDCl}_3$ )

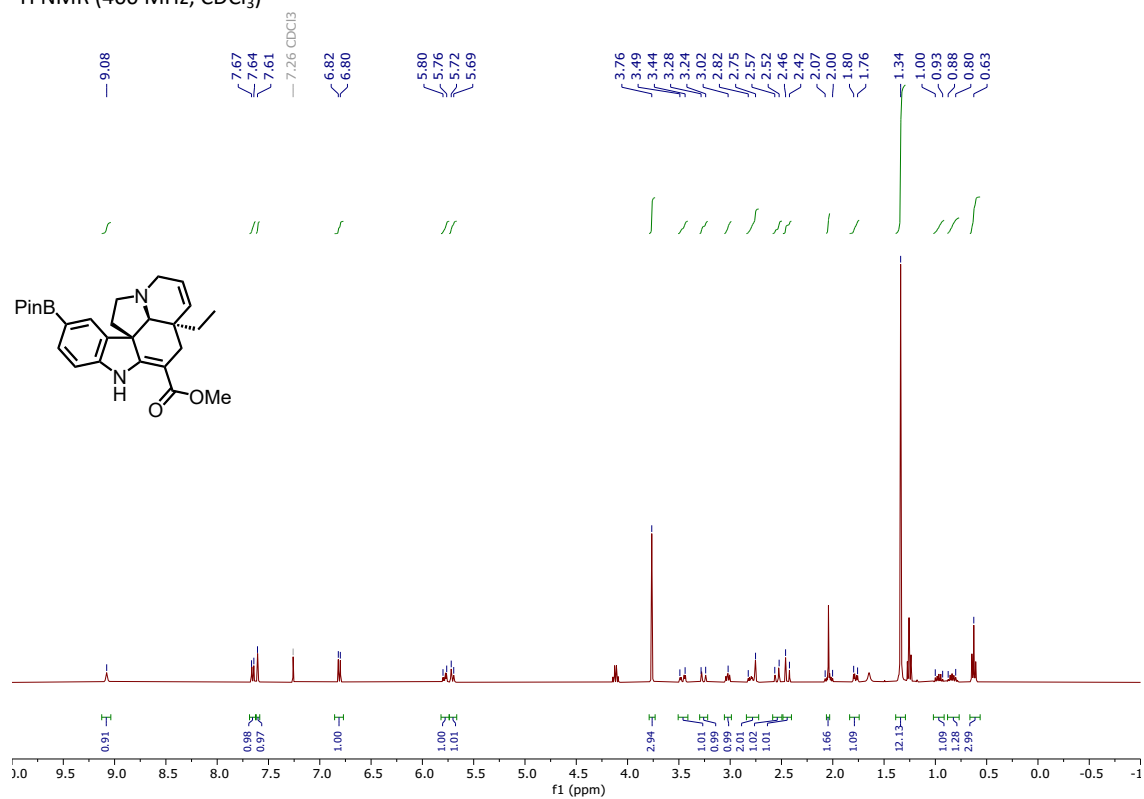

$^{13}\text{C}$  NMR (101 MHz,  $\text{CDCl}_3$ )

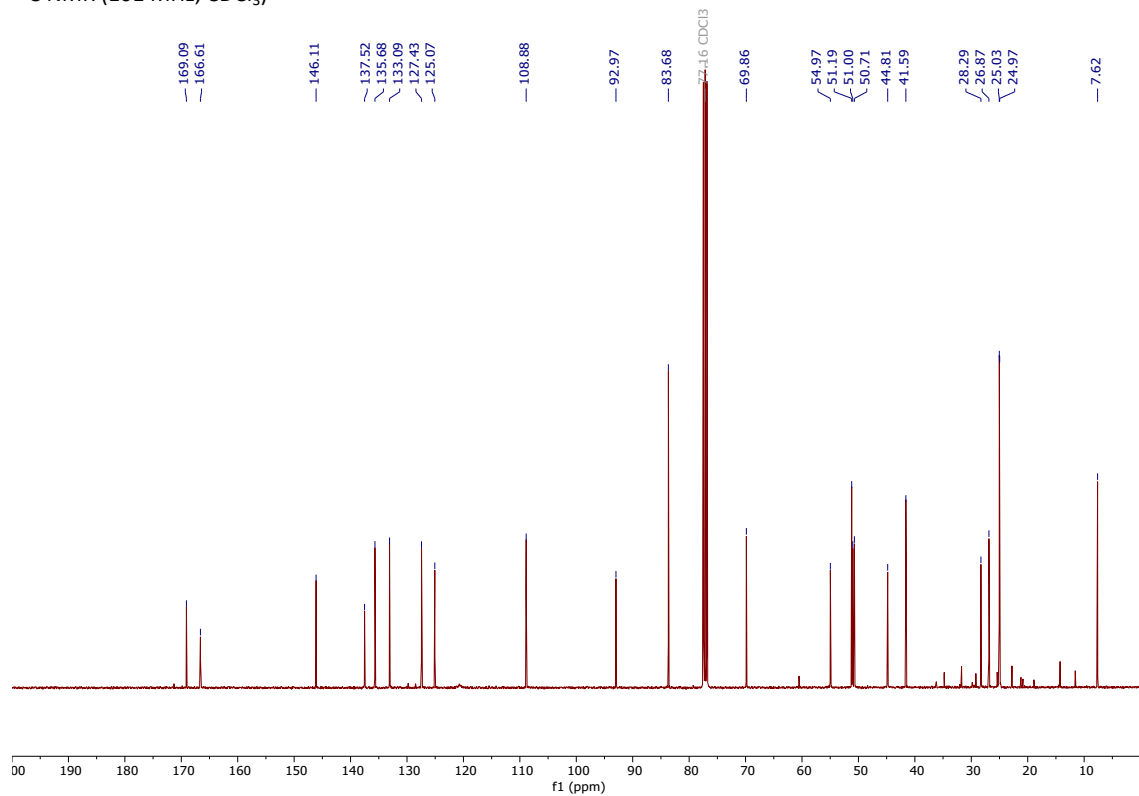



**(-)-Melodinine P (6)**

$^1\text{H}$  NMR (400 MHz,  $\text{CDCl}_3$ )

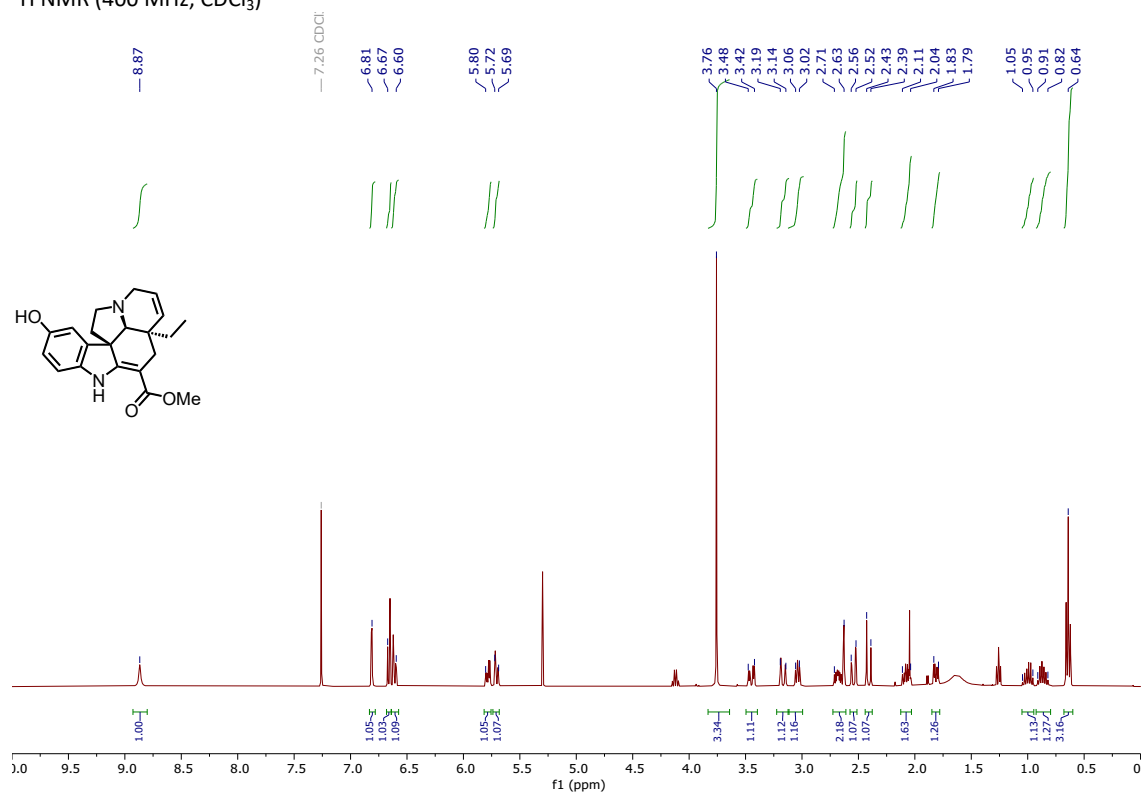

$^{13}\text{C}$  NMR (101 MHz,  $\text{CDCl}_3$ )

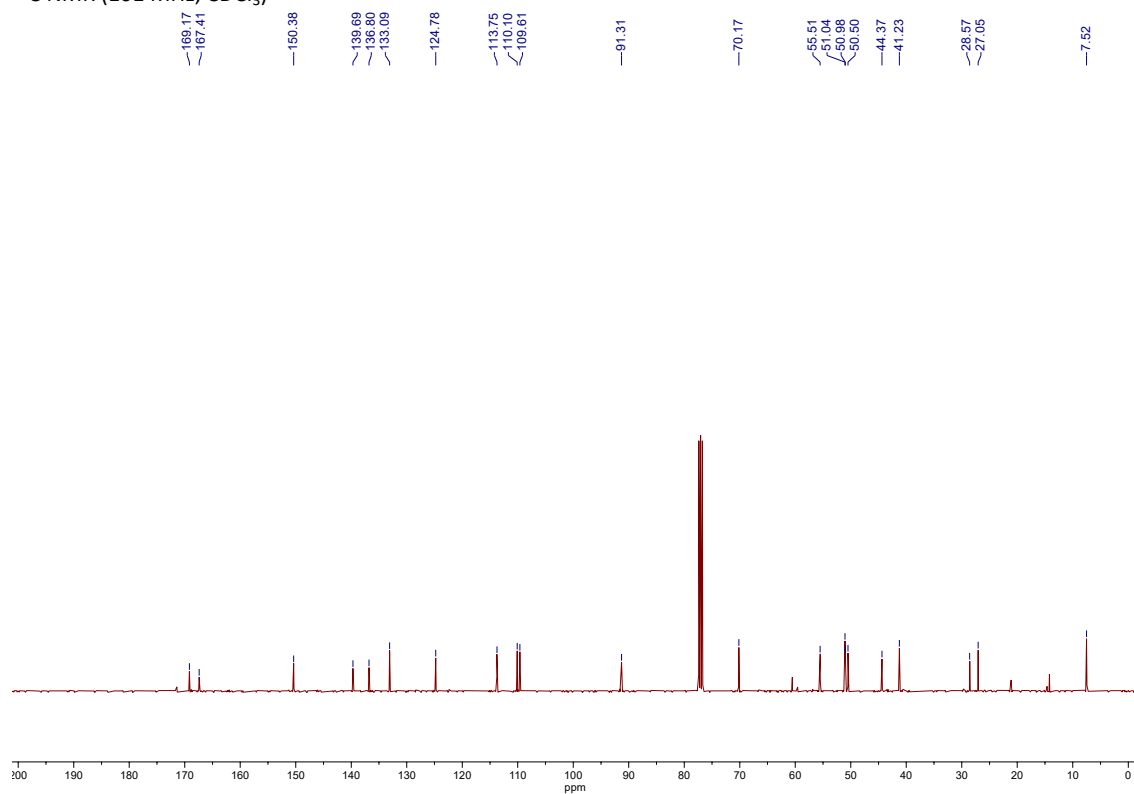

<sup>1</sup>H NMR (400 MHz, CDCl<sub>3</sub>)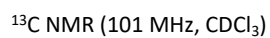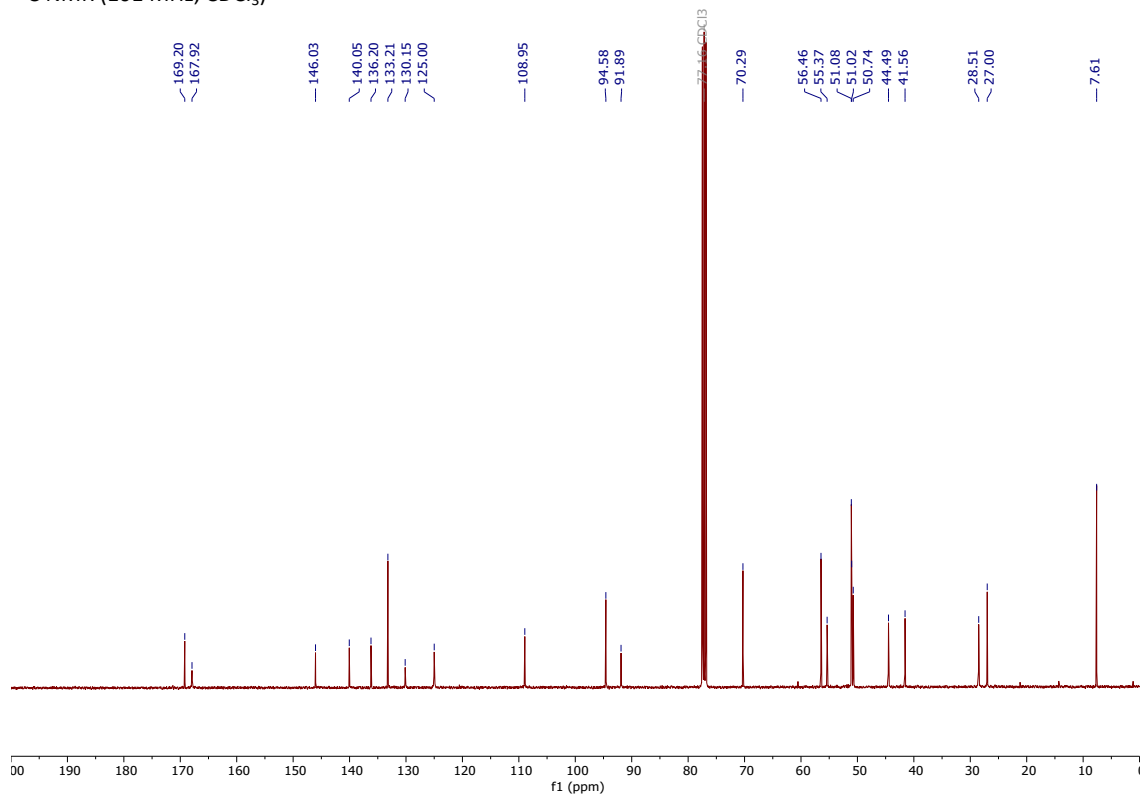

**(-)-Jerantinine A fluorosulfate (7)**

$^1\text{H}$  NMR (400 MHz,  $\text{CDCl}_3$ )

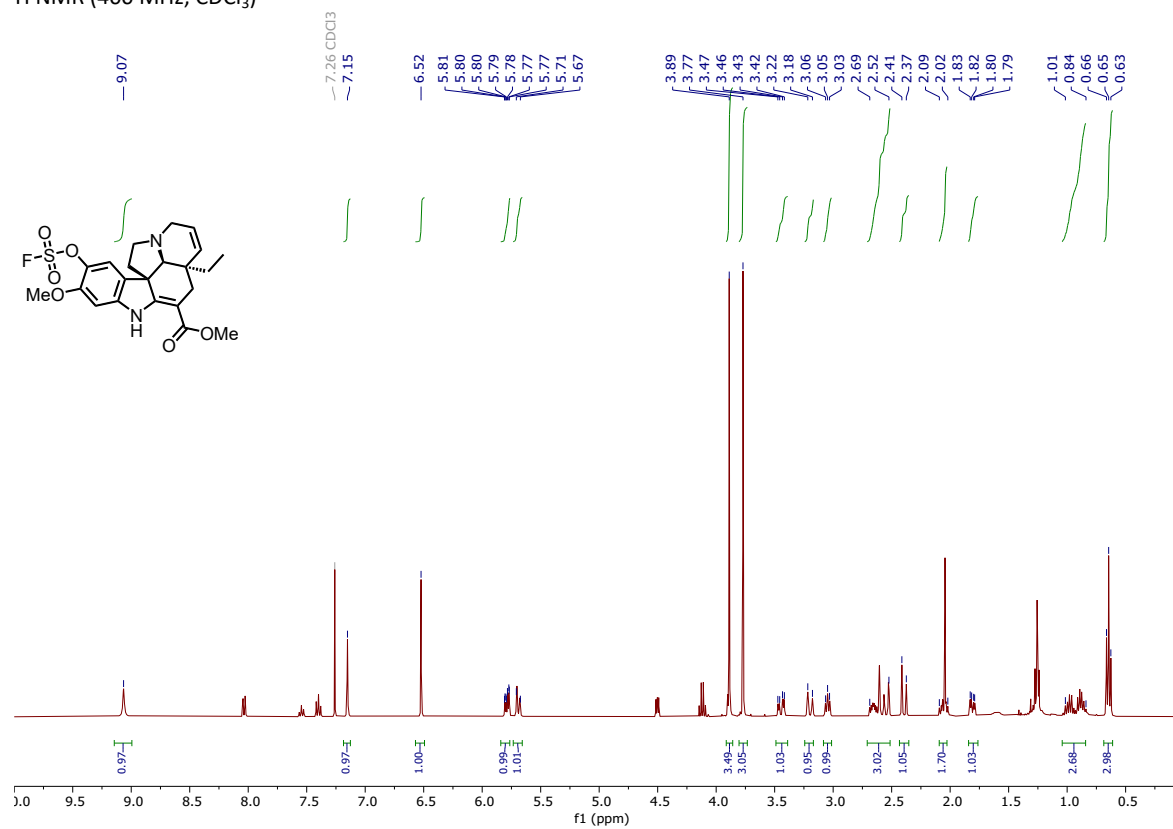

$^{13}\text{C}$  NMR (101 MHz,  $\text{CDCl}_3$ )

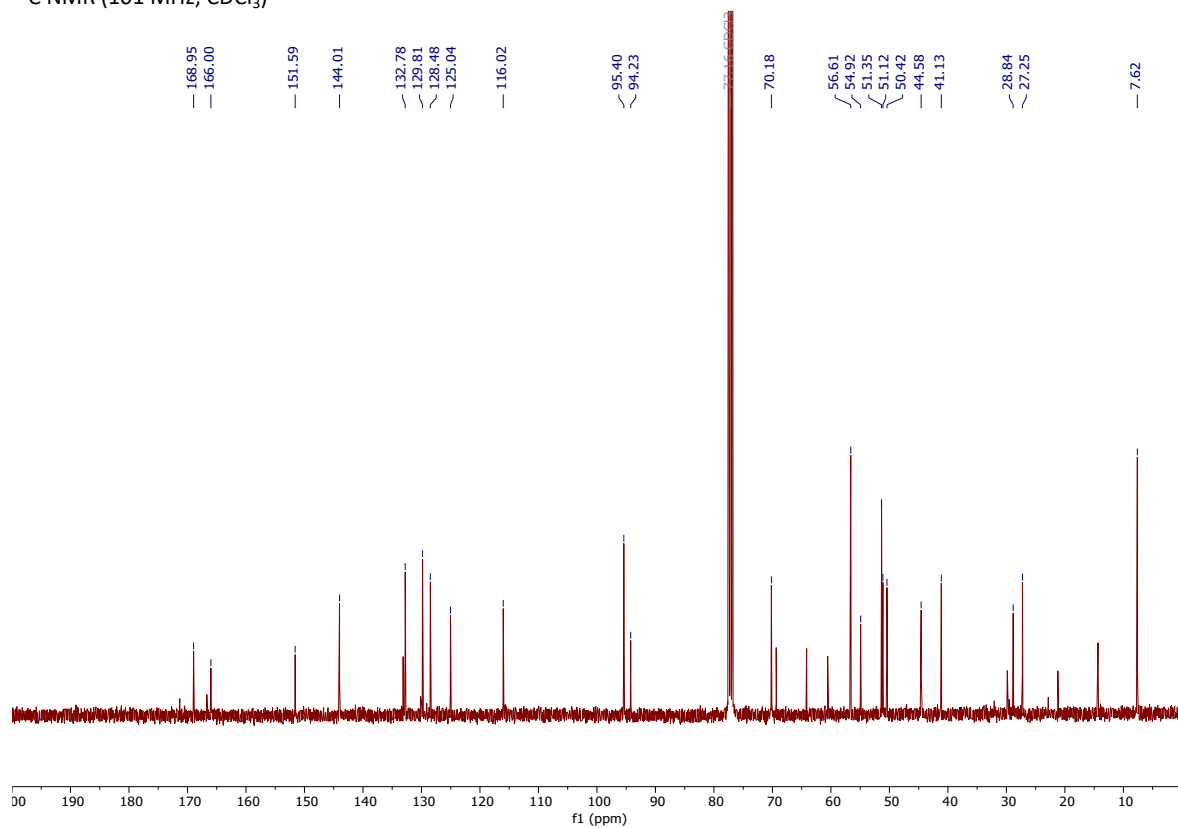

$^{19}\text{F}$  NMR (377 MHz,  $\text{CDCl}_3$ )

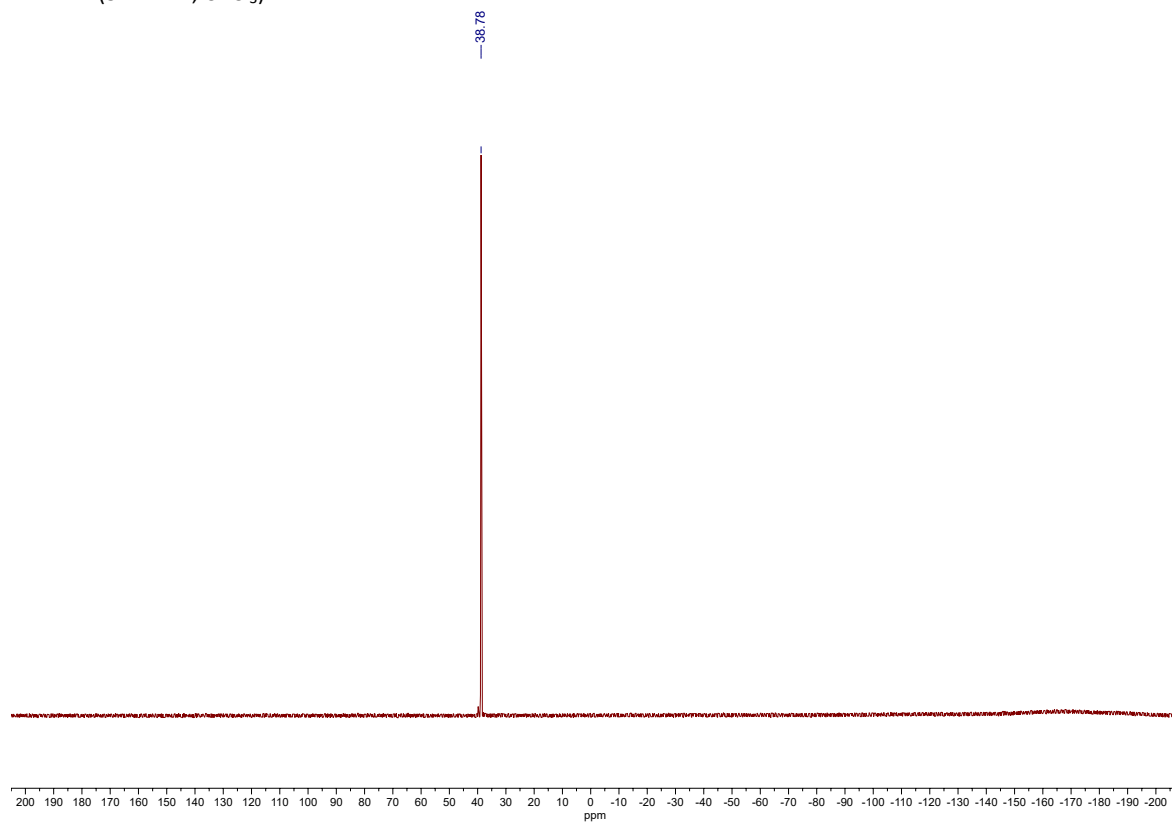

**(-)-Melodinine P fluorosulfate (8)**

$^1\text{H}$  NMR (400 MHz,  $\text{CDCl}_3$ )

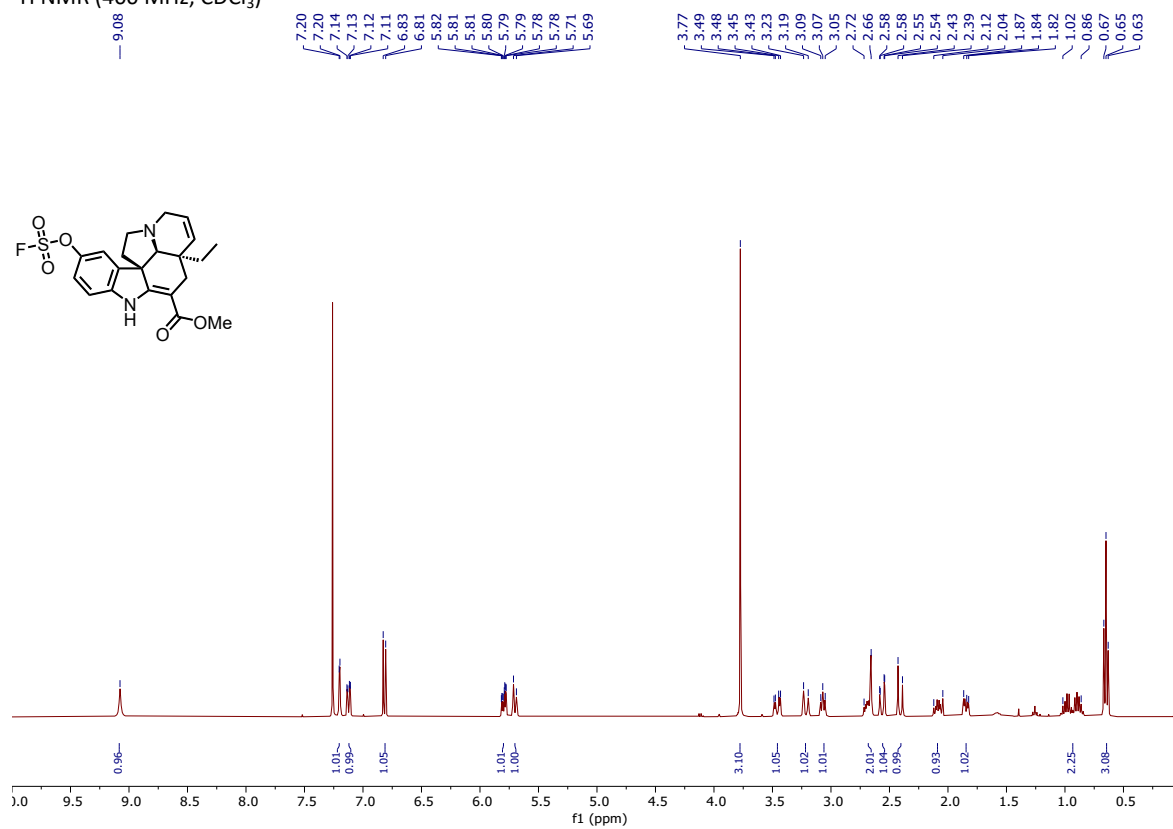

$^{13}\text{C}$  NMR (101 MHz,  $\text{CDCl}_3$ )

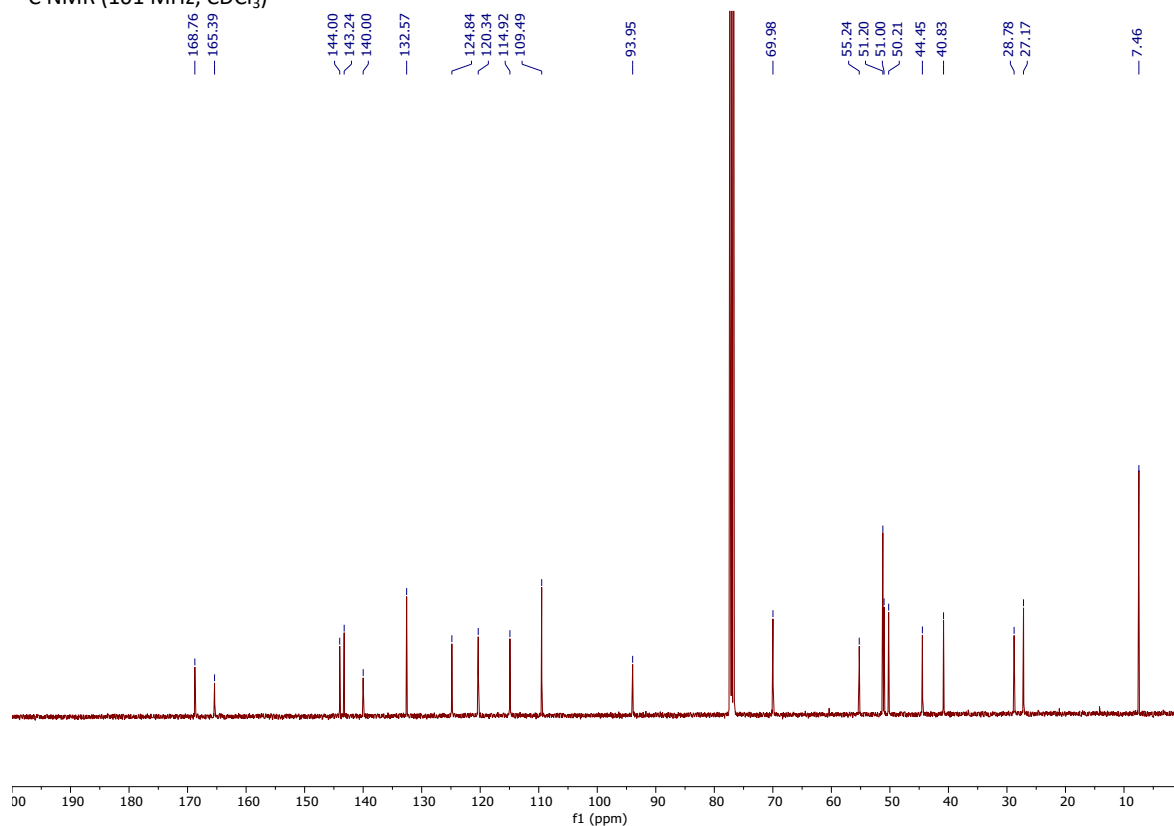

$^{19}\text{F}$  NMR (377 MHz,  $\text{CDCl}_3$ )

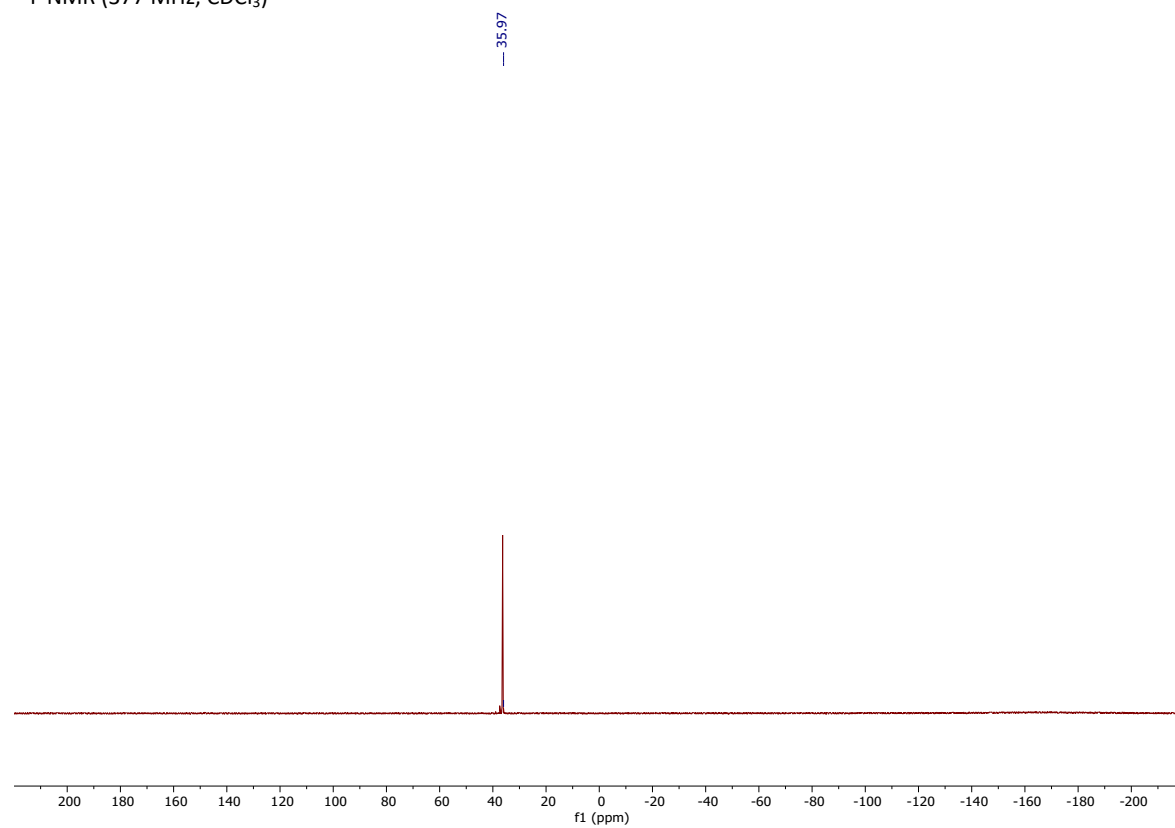

**(-)-Jerantinine A iminoquinone (9)**

$^1\text{H}$  NMR (400 MHz,  $\text{CDCl}_3$ )

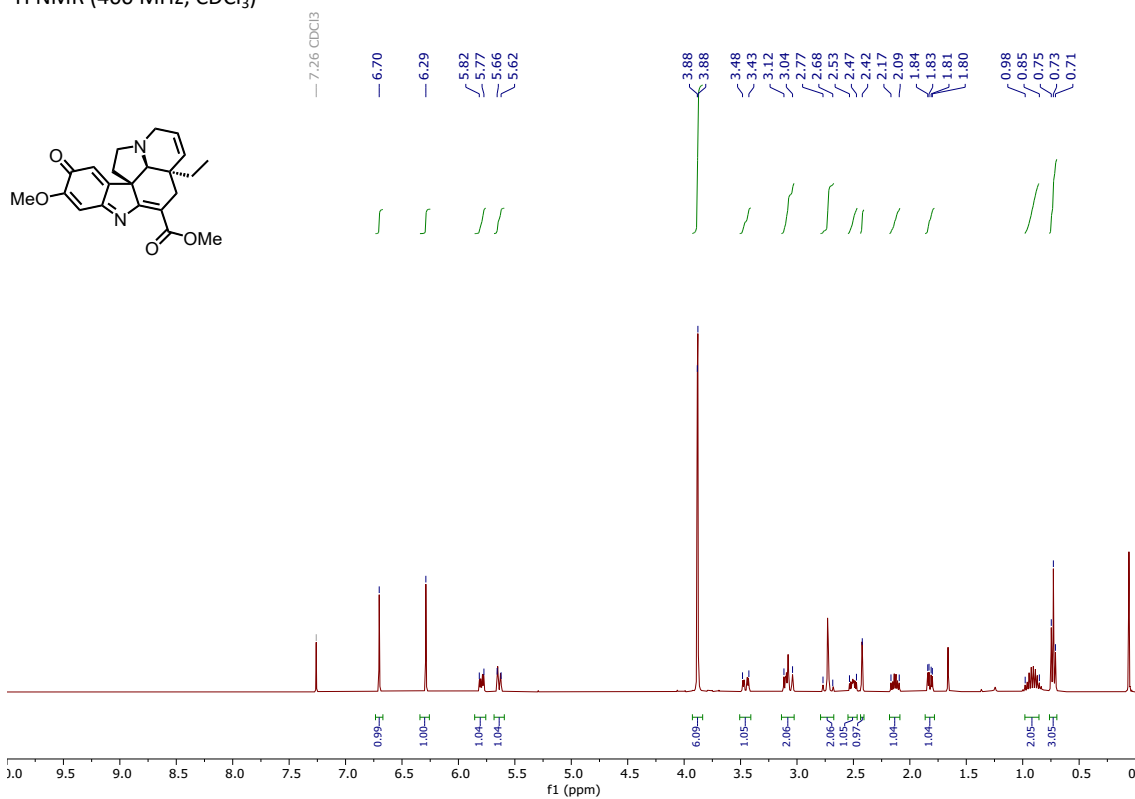

$^{13}\text{C}$  NMR (101 MHz,  $\text{CDCl}_3$ )

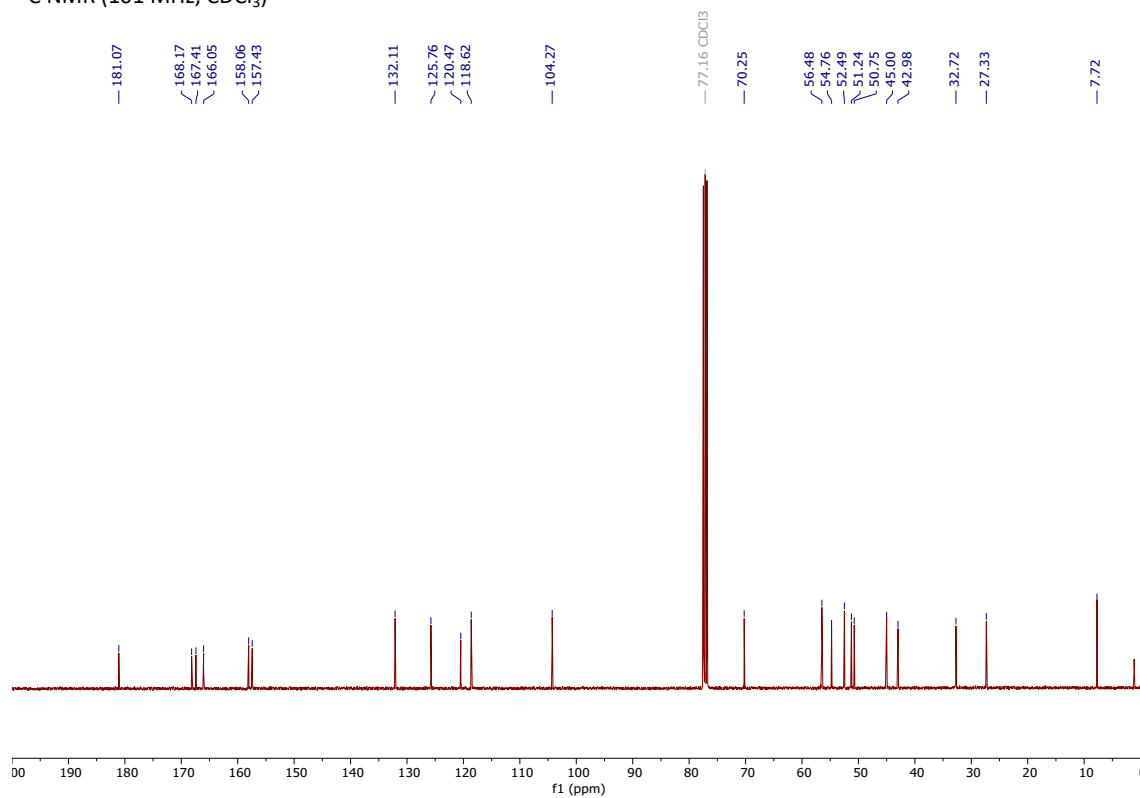

**(-)-Jerantinine A acetate (2)**

$^1\text{H}$  NMR (400 MHz,  $\text{CDCl}_3$ )

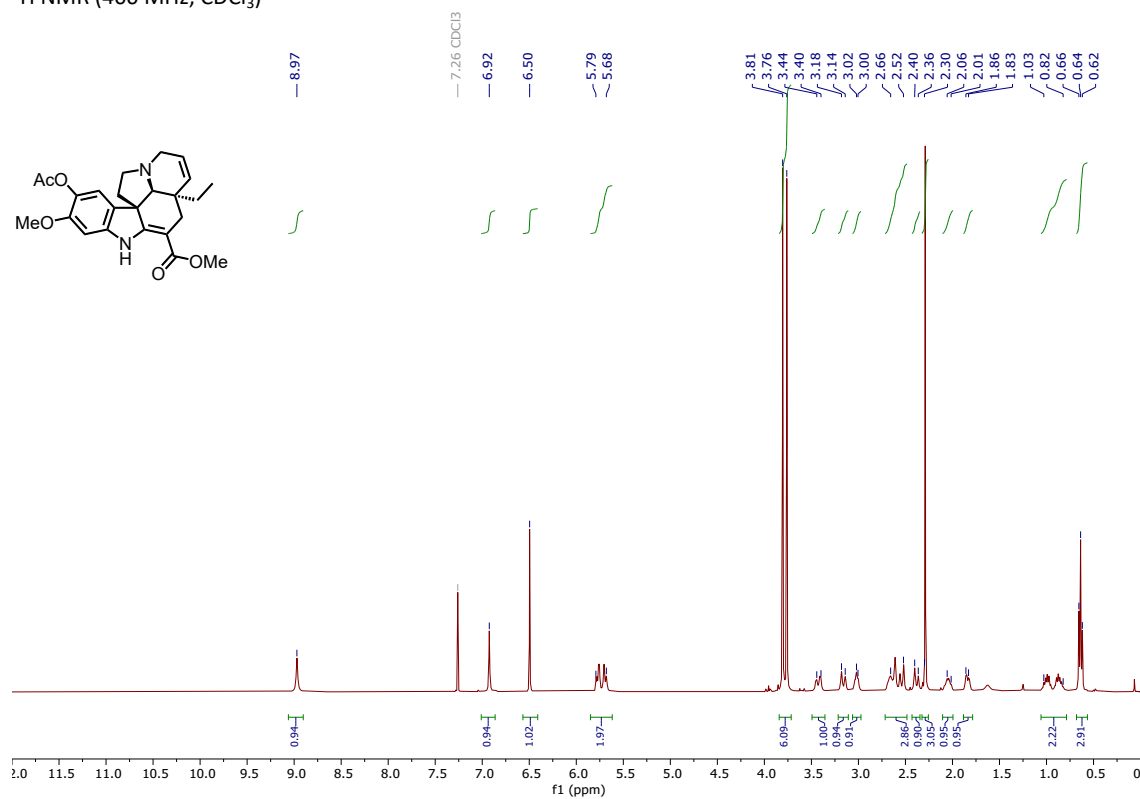

$^{13}\text{C}$  NMR (101 MHz,  $\text{CDCl}_3$ )

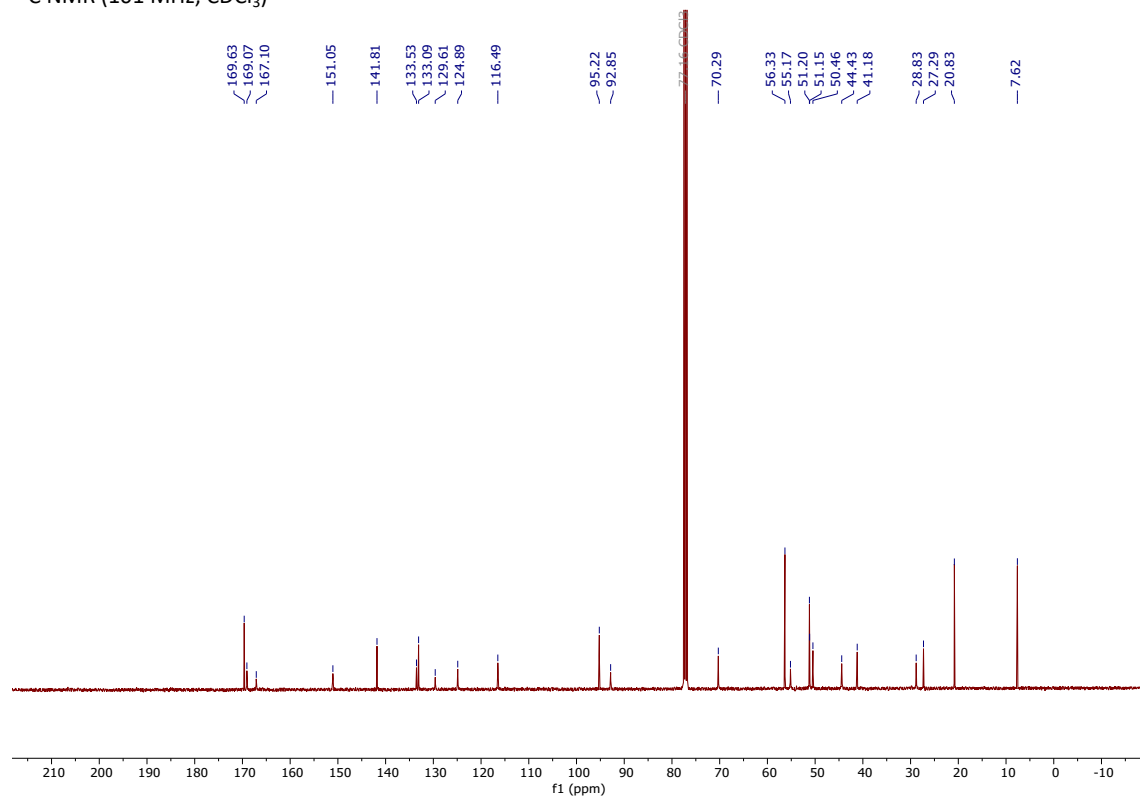



## References

1. F. Chen, M. Lei and L. Hu, *Synthesis*, 2014, **46**, 3199-3206.
2. J. Kang, T. R. Lewis, A. Gardner, R. B. Andrade and R. E. Wang, *Org. Biomol. Chem.*, 2022, **20**, 3988-3997.
3. K. H. Lim, O. Hiraku, K. Komiyama and T. S. Kam, *J. Nat. Prod.*, 2008, **71**, 1591-1594.
4. T. Chung, L. Garcia, M. M. Swamynathan, F. E. M. Froeling, L. C. Trotman, D. A. Tuveson and S. K. Lyons, *bioRxiv*, 2022, DOI: 10.1101/2022.05.30.493733, 2022.2005.2030.493733.
5. G. Tiscornia, O. Singer and I. M. Verma, *Nat. Protoc.*, 2006, **1**, 241-245.
